1 A computational model of shared fine-scale structure in the human connectome

2 Short title: Common model of the human connectome

3 J. Swaroop Guntupalli<sup>1,2,3</sup>, Ma Feilong<sup>1,2</sup>, James V. Haxby<sup>1,2,\*</sup>

4 <sup>1</sup>Department of Psychological and Brain Sciences, Dartmouth College, Hanover, NH,

5 03755 USA

6 <sup>2</sup>Center for Cognitive Neuroscience, Dartmouth College, Hanover, NH 03755 USA

7 <sup>3</sup>Vicarious AI, Union City, CA USA

8 \*Correspondence to: [james.v.haxby@dartmouth.edu](mailto:james.v.haxby@dartmouth.edu)

9

## Abstract

10 Variation in cortical connectivity profiles is typically modeled as having a coarse spatial  
11 scale parcellated into interconnected brain areas. We created a high-dimensional  
12 common model of the human connectome to search for fine-scale structure that is  
13 shared across brains. Projecting individual connectivity data into this new common  
14 model connectome accounts for substantially more variance in the human connectome  
15 than do previous models. This newly discovered shared structure is closely related to  
16 fine-scale distinctions in representations of information. These results reveal a shared  
17 fine-scale structure that is a major component of the human connectome that coexists  
18 with coarse-scale, areal structure. This shared fine-scale structure was not captured in  
19 previous models and was, therefore, inaccessible to analysis and study.

20

## Author Summary

21

Resting state fMRI has become a ubiquitous tool for measuring connectivity in normal

22

and diseased brains. Current dominant models of connectivity are based on

23

coarse-scale connectivity among brain regions, ignoring fine-scale structure within

24

those regions. We developed a high-dimensional common model of the human

25

connectome that captures both coarse and fine-scale structure of connectivity shared

26

across brains. We showed that this shared fine-scale structure is related to fine-scale

27

distinctions in representation of information, and our model accounts for substantially

28

more shared variance of connectivity compared to previous models. Our model opens

29

new territory — shared fine-scale structure, a dominant but mostly unexplored

30

component of the human connectome — for analysis and study.

31

## Introduction

32 Resting state functional magnetic resonance imaging (rsfMRI) reveals patterns of

33 functional connectivity that are used to investigate the human connectome [1-3] and

34 parcellate the brain into interconnected areas that form brain systems and can be

35 modeled as networks [4-11]. The connectivity of a single area is considered to be

36 relatively homogeneous and typically is modeled as a mean connectivity profile.

37 Cortical topography, however, has both a coarse scale of cortical areas and a finer scale

38 of multiplexed topographies within areas [12-16]. Fine-scale within-area topographies

39 are reflected in patterns of activity that can be measured with fMRI and decoded using

40 multivariate pattern analysis (MVPA)[12,13,17]. Fine-scale variation in connectivity,

41 however, has been overlooked due to poor anatomical alignment of this variation

42 across individual brains. We ask here whether local variation in functional connectivity

43 also has a fine-scale structure, similar to fine-scale response tuning topographies, and

44 whether such variation can be captured in a common model with basis functions that

45 are shared across brains.

46 We developed a new algorithm, connectivity hyperalignment (CHA), to model

47 local variation in connectivity profiles with shared basis functions for connectivity

48 profiles across individuals and individual-specific local topographies of those

49 connectivity basis functions (Fig 1). The resultant common model connectome consists

50 of transformation matrices for each individual brain, which contain individual-specific

51 topographic basis functions, and a common model connectome space, which contains

52 shared connectivity profiles (Fig 2). Individual transformation matrices transform an

53 individual brain's connectome, in its native anatomical coordinate space, into the  
54 common model space [13,16]. The individual transformation matrices and common  
55 model connectivity matrix are derived iteratively from training data. Validity testing is  
56 done on connectivity profiles and other functional parameters from independent test  
57 data that are hyperaligned into the common model connectome space. The results  
58 show that CHA can derive these shared basis functions from functional connectivity  
59 derived from neural activity while watching an audiovisual movie and from neural  
60 activity in the resting state.

61 Fig 1. Schematic of connectivity hyperalignment (CHA).

62 (A) Connectivity can be defined as any measure of similarity between a cortical locus (e.g., surface  
63 node/voxel) and a target region. Connectivities to a target region ( $\mathbf{T}_i, \mathbf{T}_j, \mathbf{T}_k, \dots$ ) of loci in a  
64 searchlight yield a connectivity pattern for that target in that searchlight. These patterns can be  
65 analyzed as connectivity pattern vectors ( $\mathbf{v}_i, \mathbf{v}_j, \mathbf{v}_k, \dots$ ) in a space in which each cortical locus in  
66 that region is a dimension. (B) Connectivity pattern vectors ( $\mathbf{v}_1, \mathbf{v}_2, \dots, \mathbf{v}_n$ ) in a region of interest or a  
67 searchlight to be hyperaligned are calculated for target regions ( $\mathbf{T}_1, \mathbf{T}_2, \dots, \mathbf{T}_n$ ) distributed uniformly  
68 across the whole cortex. At this stage connectivity hyperalignment derives transformation matrices  
69 for each brain ( $\mathbf{R}_1, \mathbf{R}_2, \dots$ ) in each searchlight that align these vectors across subjects into a common  
70 high-dimensional connectivity space. (C) For each subject, searchlight transformation matrices are  
71 aggregated into a whole cortex transformation matrix,  $\mathbf{R}_{1A}$ , as in [16], affording projection of  
72 connectivity data into a whole cortex common model connectome space. Conversely, the transpose  
73 of a whole cortex transformation matrix can project connectivity data from the whole cortex common  
74 connectome space back into that subject's cortical anatomy.

75 Figure 2. Schematic of data and transformation matrices for the common connectome.  
76 The connectivity data for an individual subject,  $\mathbf{i}$ , in that subject's native brain space,  $\mathbf{B}_i$ , is projected  
77 into the common model connectome space,  $\mathbf{M}_i$ , by multiplying it with the transformation matrix,  $\mathbf{R}_i$ .  
78 Vectors in data matrix rows are connectivity pattern vectors — patterns of connectivity with a single  
79 connectivity target time-series across cortical nodes/voxels in the individual's native brain space or  
80 across model dimensions in the common model connectome. Vectors in data matrix columns are  
81 connectivity profile vectors — connectivities of a single node/voxel or model dimension across  
82 connectivity targets. The transformation matrix contains weights for the linear transformation of  
83 connectivity vectors in an individual's brain data space into the common model connectome space.  
84 Vectors in transformation matrix columns for model dimensions are patterns of weights for a local  
85 field of voxels/nodes and serve as topographic basis functions. Individual variation in the fine-scale  
86 topographic pattern of connectivity to a target is modeled as a weighted mixture of multiplexed or  
87 overlaid topographies for model dimensions.

88 The resultant common model connectome accounts for substantially more  
89 shared variance in functional connectivity derived from both movie fMRI data and  
90 resting state fMRI data than was accounted for by previous models. This shared  
91 variance resides in fine-scale local variations in connectivity. We show further that this  
92 local variability in functional connectivity profiles is meaningful in that it is closely  
93 related to local patterns of response that encode fine distinctions among  
94 representations. Our results indicate that shared fine-scale local variation, which was  
95 not evident in previous models, is a major component of the human connectome that  
96 coexists with shared coarse-scale areal structure. Our common model connectome  
97 makes this fine-scale local variation accessible for group-level study of its network  
98 properties.

99

## Results

100 We derived a common model of the human connectome by applying CHA to  
101 fMRI data collected while 11 subjects viewed a full-length movie [13,16] and to rsfMRI  
102 data for 20 subjects in the Human Connectome Project (HCP) database [18-20]. The  
103 common model connectome is high-dimensional with connectivity profiles for model  
104 dimensions that serve as basis functions for modeling the connectivity profiles of  
105 cortical loci in individual brains. We validated the common model in terms of 1)  
106 increased intersubject correlations (ISCs) of connectivity profiles, and 2) increased  
107 spatial specificity of shared connectivity profiles. To test whether this fine-scale  
108 structure is meaningful for the representation of information, we tested the effect of  
109 CHA on 3) ISCs of representational geometry for the movie, 4) between-subject  
110 multivariate pattern classification (bsMVPC) of responses to the movie and 5) ISCs of  
111 task activation and contrast maps from the HCP database. The first two validation  
112 experiments are designed to test whether connectivity hyperalignment improves  
113 alignment of functional connectivity across brains in a way that preserves the fine-grain  
114 spatial granularity of variation in connectivity profiles. These validations were tested on  
115 functional connectivity derived from both the movie and rsfMRI data. The third, fourth,  
116 and fifth validation experiments are designed to test whether the transformation of  
117 individual brain spaces into the common model space better aligns topographies  
118 associated with representation of information and cognitive processes. The third and  
119 fourth validations were tested on the movie data. The fifth validation test used rsfMRI  
120 and task fMRI data from the HCP database.

121 *Intersubject correlation of connectivity profiles*

122 CHA afforded large increases in ISCs of connectivity profile vectors in both the  
123 movie fMRI data and the rsfMRI data (Figures 3 and 4).

124 Increases in ISCs of functional connectivity derived from movie data were  
125 distributed across all of cortex (Fig 3). ISC at a cortical node is the correlation of the  
126 one subject's connectivity profile with the mean of other subjects' profiles, indexing  
127 how well other subjects' connectivity profiles can predict an individual's connectivity  
128 profiles. Fig 3A shows a cortical map of mean ISCs of connectivity profiles in the  
129 common model connectome space as compared to ISCs in anatomically-aligned data.  
130 Fig 3B is a scatterplot of mean ISCs for individuals after anatomical alignment and  
131 CHA, which shows that CHA increased ISC for each individual and preserved individual  
132 similarity or deviance from the group. We quantify the increases in 24 functional ROIs,  
133 identified using a meta-analytic database, NeuroSynth [21](Fig 3C; table S1). Mean ISC  
134 of connectivity profiles across these ROIs was markedly higher in the common model  
135 connectome than in the anatomically-aligned data (0.67 versus 0.15; difference = 0.52,  
136 95% confidence interval, CI = [0.46, 0.56]).

137 Fig 3. ISC of connectivity profiles calculated from movie data. (A) Average ISCs of connectivity  
138 profiles in each surface node after CHA and anatomical alignment. (B) Scatter plot of individual  
139 whole cortex mean ISCs of connectivity profiles before and after CHA with linear fit. Each  
140 subject's similarity of connectome with the group is improved by CHA while preserving similarity  
141 or deviance from others. Shaded region is the 95% CI. (C) Mean ISCs of connectivity profiles in  
142 functional ROIs covering visual, auditory, cognitive, and social systems comparing the common  
143 model connectome space and anatomical alignment. Bootstrapped testing showed significantly



144 higher ISCs after CHA than after anatomical alignment in all ROIs.

145 Increases in ISCs of resting state connectivity profiles were similarly distributed  
146 across all of cortex and replicated the findings based on ISCs of movie viewing  
147 connectivity profiles (Fig 4). Fig 4A shows a cortical map of mean ISCs of resting state  
148 connectivity profiles in the common model connectome space and in data aligned with  
149 the HCP's MSM-All method (multimodal surface matching [22]). Fig 4B is a scatterplot  
150 of mean ISCs for individuals after MSM-All alignment and CHA, which shows that CHA  
151 of resting state data increased ISC for each individual and preserved individual  
152 similarity or deviance from the group. Fig 4C shows a cortical map of within-subject  
153 correlations between connectivity profiles from different resting state sessions. We  
154 quantify the increases in 26 functional ROIs, identified using a meta-analytic database,  
155 NeuroSynth [21](Fig 4D; table S1). Mean ISC of connectivity profiles across these ROIs  
156 was markedly higher in the common model connectome than in the MSM-All-aligned  
157 data (0.66 versus 0.35; difference = 0.31 [0.30, 0.33]). ISCs of resting state connectivity  
158 profiles in the common model connectome space are slightly higher than  
159 within-subject correlations of resting state connectivity profiles (mean correlation =  
160 0.64; CI for difference = [0.00, 0.05]) (Fig 4D). This latter result indicates that an  
161 individual's connectome based on resting state functional connectivity is better  
162 predicted by the common model connectome, based on other subjects' data, than by  
163 estimates based on a typical sample of that subject's own rsfMRI data, due to the  
164 benefit of estimating connectivity profiles based on a large number of brains and the  
165 precision of CHA.

166 Fig 4. ISC of connectivity profiles calculated from HCP rsfMRI data. (A) Average ISC of  
167 connectivity profiles in each surface node in the common model connectome space and after  
168 surface alignment (MSM-All). (B) Scatter plot of individual whole cortex mean ISCs of connectivity  
169 profiles before and after CHA with linear fit. Each subject's similarity of connectome with the  
170 group is improved by CHA while preserving similarity or deviance from others. Shaded region is  
171 the 95% CI. (C) Average within-subject between-session correlations in the common space. (D)  
172 Mean ISCs and WSCs of connectivity profiles in functional ROIs covering visual, auditory,  
173 cognitive, and social systems comparing the common model connectome space, within-subject  
174 between-session correlation in common space, and surface alignment.

175 The substantial increase in ISCs with hyperalignment is due in part to discovery  
176 of shared variance that was obscured by misalignment but also to suppression of  
177 unshared variance and amplification of shared variance mediated by filtering the data  
178 in the transformation step with smaller weights for nodes with unshared or noisy  
179 variance and larger weights for nodes with shared variance. To gauge the size of the  
180 effect of filtering independent of better information alignment, we calculated ISCs in  
181 data that are filtered by our algorithm but aligned based on anatomy or MSM-All (see  
182 methods). ROI mean ISCs of connectivity profiles in movie data filtered with CHA but  
183 aligned based on anatomy was 0.22 (CHA versus filter-control difference = 0.45 [0.39  
184 0.49]) and for HCP resting state data filtered with CHA but aligned based on MSM-All  
185 was 0.41 (CHA versus filter-control difference = 0.25 [0.23, 0.27]). These ISCs are larger  
186 than ISCs of unfiltered, anatomically and MSM-All-aligned data but, nonetheless, still  
187 markedly lower than ISCs of connectivity profiles in the common model connectome  
188 space, which is both filtered and re-aligned by CHA.

189 *Spatial granularity of connectivity profile variation*

190 We investigated the spatial specificity of the common model connectome by  
191 computing the intersubject spatial point spread functions (PSF) of ISC of connectivity  
192 profiles [16]. The PSF of connectivity profiles was computed as the correlation of the  
193 connectivity profile in a cortical surface node for a given subject with the average  
194 connectivity profiles of other subjects in the same node and nodes at cortical distances  
195 ranging from 3 to 12 mm. We similarly calculated within-subject PSFs based on  
196 within-subject correlations (WSC) of connectivity profiles between two resting state  
197 sessions. Fig 5A shows the slopes of connectivity profile PSFs for movie data in 24  
198 functionally-defined ROIs, and Fig 5B shows the mean PSF across these ROIs as a  
199 function of cortical distance) in the common model connectome space and in  
200 anatomically-aligned data. CHA increased the average slope of PSF across these ROIs,  
201 relative to anatomical alignment, from 0.013 to 0.105 (difference=0.092 [0.080, 0.099]).  
202 Fig 5C shows the slopes of connectivity profile PSFs for resting state connectivity  
203 profiles in the 26 functionally-defined ROIs, and Fig 5D shows the mean PSF across  
204 these ROIs (ISC or WSC as a function of cortical distance) in the common model  
205 connectome space, in MSM-All-aligned data, and within-subject. CHA increased the  
206 average slope of PSF across these ROIs, relative to MSM-All alignment, from 0.012 to  
207 0.065 (difference=0.053 [0.047, 0.055]). The intersubject PSF slopes in the common  
208 model connectome space and the PSF within-subject (slope = 0.067) were not  
209 significantly different (difference = 0.002 [-0.002, 0.007]). This fine spatial granularity  
210 was ubiquitous in cortex, with steep PSFs in sensory-perceptual areas in occipital and

211 temporal cortices as well as in higher-order cognitive areas in lateral and medial  
212 parietal and prefrontal cortices.

213 Fig 5. Spatial granularity of shared connectivity profiles. The intersubject point spread function  
214 (PSF) of connectivity profile correlations are computed as the correlation between the  
215 connectivity profile for a cortical locus in one subject and the profiles of the same locus and its  
216 spatial neighbors in other subjects at increasing distances from that locus. For the HCP rsfMRI  
217 data, within-subject PSFs are computed as the correlation between the connectivity profile for a  
218 cortical locus from one rsfMRI session and the profiles of the same locus and its spatial neighbors  
219 from a different rsfMRI session. Slope is estimated in each functional ROI as the linear fit of  
220 intersubject or within subject correlations as a function of distance. (A) Slope of PSFs for movie  
221 viewing connectivity profiles in 24 functional ROIs. (B) Average movie viewing connectivity PSF  
222 across all ROIs is plotted as ISC as a function of cortical distance. (C) Slope of PSFs for resting  
223 state connectivity profiles in 26 functional ROIs. (D) Average resting state connectivity PSF  
224 across all ROIs is plotted as ISC or WSC as a function of cortical distance.

225 The mean PSFs across ROIs (Fig 5B and 5D), clearly show that CHA captures  
226 fine-scale variations in connectivity profiles for neighboring cortical nodes across  
227 subjects that are not captured by anatomical alignment or MSM-All alignment. The  
228 ISCs of connectivity profiles for neighboring nodes in the common model connectome  
229 are substantially lower than ISCs for the same node (movie data: 0.21 [0.18, 0.23];  
230 resting state: 0.09 [0.08,0.09]). Similar fine spatial granularity is seen in the  
231 within-subject between-session PSFs for resting state connectivity profiles (0.10 [0.09,  
232 0.10]). By contrast, ISCs for connectivity profiles in the anatomically-aligned and  
233 MSM-All aligned data barely differ for nodes spaced 0 versus 1 voxel/3 mm (differences

234 =0.005, [0.005, 0.005] and 0.004, [0.004,0.015], respectively) and 2 voxels/6 mm (0.01  
235 [0.01, 0.02] and 0.02 [0.01, 0.02], respectively) apart. Decrements for larger distances  
236 (ISCs of nodes spaced 3 voxels/9 mm: 0.03 [0.03, 0.03] and 0.03 [0.03,0.03],  
237 respectively; and 4 voxels/12 mm: (0.05 [0.05, 0.06] and 0.05 [0.04,0.05], respectively)  
238 were similarly small.

239 *Generalization to fine-scale patterns in response tuning*

240 Next we asked if this shared variance in fine-scale local variation in connectivity  
241 profiles carries meaning by testing whether it reflects fine-scale variations in response  
242 tuning topographies that carry fine-grained distinctions in representation. We tested  
243 whether projecting movie response data into the CHA-derived common connectome  
244 space afforded better alignment of representational geometry for movie time-points  
245 and better bsMVPC of movie time segments.

246 Results show that shared fine-scale structure in the common model connectome  
247 is closely related to fine distinctions in representations. Fig 6A shows a cortical map of  
248 mean ISCs of local representational geometry after anatomical alignment and in the  
249 common model connectome. Representational geometry is the matrix of all pairwise  
250 similarities between patterns of response to different time-points in the movie, resulting  
251 in a matrix of more than 800,000 pairwise similarities (see methods). Fig 6B shows a  
252 cortical map of mean bsMVPC accuracies for 15 s movie time-segments in searchlights  
253 after anatomical alignment and CHA. CHA greatly increased both ISCs of  
254 representational geometry and bsMVPC accuracies. Quantification of these effects in  
255 functional ROIs is illustrated in Fig S3. CHA significantly increased ISCs of

256 representational geometry in all ROIs (ROI mean ISCs = 0.308 and 0.210 after CHA  
257 and anatomical alignment, respectively, difference = 0.097 [0.080, 0.110]). CHA also  
258 dramatically increased bsMVPC accuracies in all ROIs (ROI mean bsMVPC accuracies =  
259 10.37% and 1.04% after CHA and anatomical alignment, respectively, difference =  
260 9.33% [7.71%, 10.54%]).

261 Fig 6. Effect of CHA on ISC or representational geometries and bsMVPC of movie data. (A) ISC  
262 of representational geometry in each voxel mapped onto the cortical surface. (B) Accuracies for  
263 bsMVPC of 15 s movie segments. Classification was performed within each movie half  
264 separately, and the accuracies are then averaged across the two halves. Parameters for  
265 hyperalignment are derived from the half that was not used for classification.

#### 266 *Generalization to task maps from the HCP database*

267 We tested the generalization of the common model connectome derived from  
268 resting state fMRI by applying connectivity hyperalignment parameters derived from  
269 one session of resting state data to task maps provided by the HCP database  
270 comprised of 32 task activation maps and 14 task contrast maps (Supplemental Table  
271 S2). These task maps reflect simple operations and, thus, do not have the same  
272 fine-grained structure that is associated with activation by dynamic, naturalistic stimuli  
273 such as a movie. We calculated the ISC of these task maps between each subject and  
274 the average of others before and after hyperalignment. Hyperalignment improved  
275 correlations on average across all tasks and in all but two (Face-Shapes and  
276 Body-Average, labeled ns) task contrast maps (Fig 7). The average correlation across  
277 task maps increased from 0.58 to 0.65 (mean difference = 0.07 [0.06, 0.08]).

278 Figure 7. ISCs of HCP task activation and contrast maps after CHA and surface alignment  
279 (MSM-All).

280 *Comparison of CHA and Response Hyperalignment (RHA)*

281 Since CHA aligned fine-scale patterns of response tuning functions across  
282 subjects better than anatomy-based alignment, we asked how well it compares to our  
283 previously published response-based hyperalignment (RHA) [16]. Because RHA requires  
284 responses that are synchronized across subjects in time, it cannot be applied to resting  
285 state data. We compare CHA and RHA of movie viewing data on 1) ISC of connectivity  
286 profiles, 2) ISC of representational geometry, and 3) bsMVPC of 15 s movie segments.

287 Results showed that both CHA and RHA increased ISCs and bsMVPC  
288 classification accuracies significantly over anatomy-based alignment, but each  
289 algorithm achieves better alignment for the information that it uses to derive a  
290 common model, namely connectivity profiles and patterns of response, respectively.  
291 ISCs of connectivity profiles are significantly higher in a common model based on CHA  
292 than in a common model based on RHA (ROI mean ISCs = 0.67 and 0.575,  
293 respectively; CHA-RHA difference = 0.095 [0.081, 0.112])(Supplemental Figure S2). By  
294 contrast, RHA marginally but significantly outperforms CHA on some validations based  
295 on response tuning functions, namely ISCs of representational geometry (ROI means =  
296 0.322 and 0.308, respectively; RHA-CHA difference = 0.014 [0.007,  
297 0.019])(Supplemental Figure S3), and bsMVPC of movie segments (ROI mean  
298 accuracies = 13.65% and 10.37%, respectively; RHA-CHA difference = 3.28% [2.76%,

299 3.78%))(Supplemental Figure S4).

## 300 Discussion

301 These results show that fine-scale local variation in connectivity profile is a major  
302 component of the human connectome that can be modeled with shared connectivity  
303 basis functions. Each connectivity basis function has a connectivity profile that is  
304 shared across subjects and a different local connectivity topography in each individual  
305 brain. These basis functions are derived from multiple subject data in local cortical  
306 fields. An individual's connectivity pattern in a cortical field is modeled as multiplexed  
307 or overlaid connectivity topographic basis functions, and the connectivity profile of  
308 each cortical node or voxel is modeled as a weighted mixture of local connectivity  
309 profile basis functions. Thus, the connectivity profile for each voxel or node is modeled  
310 as a high-dimensional vector of connectivity profile bases, capturing how it varies  
311 locally from its neighbors, rather than modeling the connectivity of a brain area as a  
312 single connectivity profile that is shared by all voxels or nodes. We show that these  
313 shared basis functions can be discovered with connectivity hyperalignment of data  
314 collected during viewing and listening to a rich naturalistic movie and during the  
315 resting state. These basis functions constitute a common model connectome. Shared  
316 fine-scale variation is a ubiquitous characteristic of all of human cortex and is a major  
317 component of the human connectome that coexists with shared coarse-scale areal  
318 variation.

319 We show that patterns of connectivity exhibit fine-scale variation that is captured  
320 in the CHA-derived common model connectome. We define fine-scale structure as



321 voxel-by-voxel or node-by-node variation in response and connectivity profiles, as  
322 compared to the coarse structure of parcels that consist of sets of voxels or surface  
323 nodes and are treated as a functional unit with a homogeneous functional profile. In  
324 Figure 8 we illustrate the fine scale structure that is captured in the common model  
325 connectome for connectivity patterns in a left lateral-occipital/inferior-temporal cortex  
326 cortical field. Quantitatively, we show that shared fine-scale structure is captured in the  
327 common model connectome with a direct measure of the spatial granularity of local  
328 variation in connectivity profiles — the intersubject point-spread function. The  
329 intersubject spatial point-spread function for variation in connectivity profiles is  
330 dramatically, six to eight-fold, steeper after data are transformed into the common  
331 model connectome than for data that are anatomically aligned. Next we show that  
332 capture of this fine-scale structure in functional connectivity generalizes to capture of  
333 fine-scale structure in neural representation. Transformation of movie data into the  
334 common model space, using matrices derived from functional connectivity in  
335 independent movie data, afford bsMVPC of time segments that are tenfold higher than  
336 for anatomically-aligned data. bsMVPC of movie time segments relies on fine-scale  
337 structure that is not well-aligned based on anatomy, nor on functional alignment using  
338 a “rubber-sheet” warping of cortical topographies, nor on hyperalignment based on  
339 responses to a limited variety of still images of visual categories [13,16, 23-25]. ISCs of  
340 local representational geometries also are dramatically higher after CHA than after  
341 anatomical alignment. These local representational geometries reflect fine-scale  
342 structure that reveals how information spaces in different cortical fields vary, offering a

343 window on how these spaces are transformed along processing pathways and  
344 reshaped by task demands [26-28]. Finally, we also show that transformations derived  
345 from rsfMRI improve alignment of topographies in task activation and task contrast  
346 maps in the HCP database.

347 Figure 8. Mean group connectivity patterns in a left lateral-occipital/inferior temporal cortical field.  
348 Connectivity patterns were measured from movie data for functional connectivity with connectivity  
349 targets in mid lateral fusiform gyrus and mid superior temporal sulcus. Mean group connectivity  
350 patterns are shown for data in the common model connectome, derived with CHA based on  
351 responses to the other half of the movie, and for anatomically aligned data. Mean ISCs for patterns  
352 after CHA are higher than after anatomical alignment for both the fusiform target (0.835 versus  
353 0.175) and the STS target (0.826 versus 0.306). The occipitotemporal, mid fusiform, and mid STS  
354 loci are taken from the face-responsive fields identified by Visconti di Oleggio Castello, Halchenko,  
355 et al. [28]. The locations of the fusiform and STS targets are indicated with green and blue dots,  
356 respectively. The inflated cortical surface is tipped to provide a clear view of the cortical field.  
357 Connectivities are correlations of time-series responses to the movie.

358 The existence and importance of fine-scale connectivity is well-recognized  
359 [29-31] but previously was not modeled in a common computational framework and,  
360 consequently, was largely overlooked. Attempts to model within-area topographies of  
361 connectivity either were limited mostly to within-subject analyses or coarser within-area  
362 topographies that could be captured with anatomy-based alignment of group data  
363 [31]. Consequently, when not simply overlooked, within-area variations in connectivity  
364 profiles were usually analyzed as gradients that have a single cycle in a cortical area,  
365 such as retinotopy or somatotopy [29-31].

366 Other models of shared structure in the human connectome have focused on  
367 the identification of shared functional networks that can be identified with cluster  
368 analysis (e.g. [5,32,33]) or independent components analysis (ICA; e.g. [19]). These  
369 methods do not attempt to align the fine-scale structure within areas in these networks.  
370 In some approaches, each voxel is assigned to one cluster or system and is, thereby,  
371 associated with the time-series tuning function that characterizes that cluster  
372 [5,8,32,33]. Approaches that use ICA, or related componential analyses such as PCA or  
373 SVD, have the potential to capture node-by-node variation in connectivity profiles, but  
374 implementations of these approaches have not adapted them to analyze this fine-scale  
375 topographic structure. For example, dual regression could allow using group ICA as a  
376 common space for modeling each voxel in an individual as a weighted sum of  
377 independent components [34,35]. In practice, however, each voxel is characterized in  
378 ICA analyses by the network to which it belongs, not as a mixture of multiplexed  
379 functional topographies. Node-by-node local variation in connectivity topographies is  
380 blurred in group analyses because individual variation on independent components is  
381 projected into anatomically-aligned brains rather than into a single reference voxel  
382 space to reveal shared fine-scale structure, as we do here. A novel approach by Langs  
383 et al. [32,33] allows nodes to be assigned to different clusters in a common functional  
384 connectivity embedding space independently of anatomical location. The  
385 implementations of this method, however, do not attempt to discover shared fine-scale  
386 structure, and the low dimensionality of the embedding space and small number of  
387 clusters are probably insufficient to capture this level of detail.

388 Cortical functional architecture has multiplexed topographies at multiple spatial  
389 scales. In primary visual cortex, retinotopy is multiplexed with ocular dominance  
390 columns, edge orientation, spatial frequency, motion direction, and motion velocity,  
391 among other low-level visual attributes [36,37]. Primary visual cortex sends coherent  
392 projections to other visual areas where these topographies are recapitulated and  
393 transformed, affording the emergence of more complex features, such as curvature,  
394 texture, shape, color constancy, and biological motion; and, subsequently, even  
395 higher-order attributes such as object categories, view-invariant face identity, and  
396 species-invariant attributes of animals such as action categories and dangerousness  
397 [12,15,26-28,38-40]. Similar transformations of multiplexed topographies characterize  
398 other sensory modalities and, undoubtedly, supramodal cognitive operations.  
399 Modeling inter-areal communication as a single value of connectivity strength sheds no  
400 light on how information is transformed along cortical processing pathways to allow  
401 high-order information to be disentangled from confounding attributes [41].

402 Multiplexed cortical topographies at multiple spatial scales can be modeled with  
403 individual-specific topographic basis functions that have shared tuning profiles [13,16]  
404 and shared connectivity profiles (as shown here). No previous model captured multiple  
405 spatial scales of connectivity topographies with connectivity profiles that are shared  
406 across brains. By capturing coarse- and fine-scale connectivity topographies with  
407 shared basis functions, the common model connectome casts a bright light on the  
408 dominant role of fine-scale connectivity patterns in the human connectome and opens  
409 new territory for investigation of the network properties of cortical connectivity at finer

410 levels of detail. With this new perspective, inter-areal connectivity can be modeled as  
411 more than a simple replication of global activity, as is the assumption underlying  
412 existing approaches to modeling the connectome, but, instead, as information  
413 processing operations in which functional topographies are transformed by projections  
414 between areas.

## 415 **Methods**

### 416 **Movie data: Raiders of the Lost Ark**

417 We scanned 11 healthy young right-handed participants (4 females; Mean age:  
418 24.6+/-3.7 years) during movie viewing. Participants had no history of neurological or  
419 psychiatric illness. All had normal or corrected-to-normal vision. Informed consent was  
420 collected in accordance with the procedures set by the local Committee for the  
421 Protection of Human Subjects. Participants were paid for their participation. These  
422 data also were used in a prior publication on whole cortex RHA [16].

423 *Stimuli and design.* Stimuli consisted of the full-length feature movie — “Raiders of the  
424 Lost Ark” — divided into eight parts of approximately 14 to 15 min duration. Video was  
425 projected onto a rear projection screen with an LCD projector which the subject viewed  
426 through a mirror on the head coil. The video image subtended a visual angle of  
427 approximately 22.7° horizontally and 17° vertically. Audio was presented through MR  
428 Confon’s MRI-compatible headphones. Participants were instructed to pay attention to  
429 the movie and enjoy. See [16] for details.

430 *fMRI protocol.* Participants were scanned in a Philips Intera Achieva 3T scanner with an  
431 8 channel head coil at the Dartmouth Brain Imaging Center. T1-weighted anatomical

432 scans were acquired at the end of each session (MPRAGE, TR=9.85 s, TE=4.53 s, flip  
433 angle=8°, 256 × 256 matrix, FOV=240 mm, 160 1 mm thick sagittal slices). The voxel  
434 resolution was 0.9375 mm × 0.9375 mm × 1.0 mm. Functional scans of the whole brain  
435 were acquired with an echo planar imaging sequence (TR=2.5 s, TE=35 ms, flip  
436 angle=90°, 80 × 80 matrix, FOV=240 mm × 240 mm) every 2.5 s with whole brain  
437 coverage (41 3 mm thick interleaved axial slices, giving isotropic 3 mm × 3 mm × 3 mm  
438 voxels). We acquired a total of 2718 functional scans with 1350 TRs in four runs during  
439 the first session and 1368 TRs in four runs during the second session.

440 *fMRI data preprocessing.* fMRI movie data were preprocessed using AFNI software  
441 [42](<http://afni.nimh.nih.gov>). Functional data were first corrected for the order of slice  
442 acquisition and head motion by aligning to the last volume of the last functional run.  
443 Any spikes in the data were removed using 3dDespike in AFNI. Data were then filtered  
444 using 3dBandpass in AFNI to remove any temporal signal variation slower than 0.00667  
445 Hz, faster than 0.1 Hz or that correlated with the whole brain average signal or the  
446 head movement parameters. Each subject's anatomical volume was first aligned to the  
447 motion corrected average EPI volume and then to the MNI 152 brain template in AFNI.  
448 Functional EPI BOLD data were then aligned to the MNI 152 brain template using  
449 nearest neighbor resampling by applying the transformation derived from the  
450 alignment of the anatomical volume to the template. Data acquired during the  
451 overlapping movie segments were discarded resulting in a total of 2662 TRs with 1326  
452 TRs in the first session and 1336 TRs in the second session.

453 *Definition of masks and searchlights for movie data.* We derived a gray matter mask by

454 segmenting the MNI\_avg152T1 brain provided in AFNI and removing any voxel that  
455 was outside the cortical surface by more than twice the thickness of the gray matter at  
456 each surface node. It included 54,034 3 mm isotropic voxels across both hemispheres.  
457 We used this mask for all subsequent analyses of all subjects.

458       Hyperalignment of movie data started with hyperalignment of data in 20,484  
459 overlapping searchlights of 20 mm radius centered on cortical nodes with 2.9 mm  
460 average spacing between the nodes. Cortical nodes were defined in a standard  
461 cortical surface from FreeSurfer (fsaverage)(<https://surfer.nmr.mgh.harvard.edu>) and  
462 resampled into a regular grid using AFNI's Maplcosahedron [42,43] with 10,242 nodes  
463 in each hemisphere. We defined the surface searchlights [44] in PyMVPA  
464 [45](<http://www.pymvpa.org>) as cortical disks. The thickness of disks was extended  
465 beyond the gray matter, as defined in FreeSurfer, 1.5 times inside the white-matter  
466 gray-matter boundary and 1.0 times outside the gray-matter pial surface boundary to  
467 accommodate any misalignment of gray matter as computed from the anatomical scan  
468 and the gray matter voxels in the EPI scan. To reduce the contribution from noisy or  
469 non-gray matter voxels that were included due to this dilation, we used a  
470 between-subject correlation measure on training data [13] to select 70% of the voxels  
471 in each searchlight [16]. The mean number of selected voxels in movie data  
472 searchlights was 235.

473       Searchlights for defining connectivity targets were defined using a coarse  
474 surface grid corresponding to the ico8 surface in SUMA [43] with 1284 nodes (10.7 mm  
475 spacing between nodes). We used surface disk searchlights [44] centered on these

476 nodes as the movie data connectivity target searchlights. These searchlights had a  
477 radius of 13 mm, as did those used for the HCP data, producing complete coverage of  
478 the cortex with overlapping searchlights. Cortical disks centered on these voxels were  
479 dilated using the same procedure as for hyperalignment of cortical surface searchlights.  
480 Movie connectivity target searchlights had a mean of 99 voxels.

481 **Resting state data: Human Connectome Project**

482 In the HCP database [20], we found unrelated subjects of age  $\leq 35$  with at least  
483 four resting state scans, yielding a list of 64 subjects. We chose the first 20 of these  
484 subjects in the sorted order of subject IDs for our analysis.

485 For each subject, we used their cortical surfaces and fMRI data aligned to the  
486 group using MSM-All [22] with 32K nodes in each hemisphere as provided by the HCP.  
487 We used data from one resting state session [19] ("rfMRI\_REST1\_LR") to derive CHA  
488 parameters and validated it on a different resting state session ("rfMRI\_REST2\_LR"),  
489 and task fMRI sessions [18](EMOTION, GAMBLING, LANGUAGE, MOTOR,  
490 RELATIONAL, SOCIAL, and WM). Resting state data were acquired for 1200 TRs with a  
491 TR of 0.720s in each session (total time=14 min 33 s). The data used to derive the CHA  
492 parameters and common model and the resting state data used for validation tests  
493 used the same phase-encoding direction (LR). We used a single session of rsfMRI for  
494 alignment to mimic a typical resting state data acquisition which usually varies from  
495 10-20 mins of scanning. See [19] for more details about the acquisition and  
496 preprocessing pipelines.

497 *Definition of masks and searchlights for HCP data.* We masked the data to include only



498 the left and right cortices (Cortex\_Left and Cortex\_Right), removing all the non-zero  
499 nodes that correspond to the medial subcortical regions, resulting in 59,412 nodes  
500 across both hemispheres. These nodes also defined the centers of 59,412 surface  
501 searchlights [44] with 20 mm radii that were used for hyperalignment. All nodes in  
502 these searchlights were included. The mean number of surface nodes in the HCP  
503 searchlights was 337.

504 We defined connectivity target searchlights using a coarser surface grid  
505 corresponding to the ico8 surface in SUMA [43] with 1284 nodes (10.7 mm spacing  
506 between nodes). We found the closest matching nodes on the 32K surface to the  
507 nodes on the ico8 surface, and used those as centers for connectivity target  
508 searchlights. These searchlights had a radius of 13 mm, producing complete coverage  
509 of the cortex with overlapping searchlights. HCP connectivity target searchlights had a  
510 mean of 142 loci. See further details below for how time-series were extracted from  
511 these searchlights.

512 For validation of task fMRI, we used all of the maps provided by the HCP after  
513 removing redundancies (such as FACE-AVG and AVG-FACE), which resulted in 46 maps  
514 (Supplemental Table S2).

## 515 Connectivity Hyperalignment

516 We use CHA to derive a common model of the human connectome and the  
517 transformation matrices that project individual brains' connectomes into the common  
518 model connectome space. The common model connectome is a high-dimensional  
519 information space. In the current implementation, the model space based on movie

520 fMRI data has 54,034 dimensions, corresponding to the number of voxels in the gray  
521 matter mask, and the model space based on HCP resting state fMRI data has 59,412  
522 dimensions, corresponding to the number of cortical nodes in those data. The  
523 derivation of this space starts with hyperalignment in local cortical fields, searchlights,  
524 which yields orthogonal transformation matrices for each subject in each field. These  
525 searchlights are aligned across subjects based on anatomy (movie data) or MSM-All  
526 (HCP resting state data); consequently, each locus within a searchlight is similarly  
527 aligned across subjects before CHA. Local transformation matrices for each searchlight  
528 map anatomically or MSM-All aligned cortical loci in a cortical field to CHA-aligned  
529 dimensions in the common model connectome. These local transformation matrices  
530 are then aggregated into a whole brain transformation matrix, which is not globally  
531 orthogonal. The whole brain transformation matrices are derived based on local  
532 hyperalignment in searchlights to constrain resampling of information to cortical  
533 neighborhoods defined by those searchlights.

534 *The basic equation for hyperalignment (both CHA and RHA).*  $B_{ij}$  are the original  
535 matrices of data for cortical fields,  $j$ , in individual brains,  $i$ , which have  $m_{ij}$  columns of  
536 cortical loci and  $n$  rows of data vectors. Hyperalignment derives a transformation  
537 matrix for each cortical field in each individual,  $R_{ij}$ , and a matrix for each cortical field,  
538  $M_j$ , that is the mean of transformed individual brain matrices,  $B_{ij}R_{ij}$ , minimizing the  
539 Frobenius norm of differences between transformed individual brain matrices and the  
540 model space matrix. For each cortical field  $j$ :

541

equation 1. 
$$M_j = (1/N) \sum_{i=1}^N (B_{ij} R_{ij}) \quad \text{where} \quad R_{ij} = \underset{R}{\operatorname{argmin}} \sum_{i=1}^N \|B_{ij} R - M_j\|_F$$

542 For whole cortex hyperalignment we define the cortical fields,  $j$ , as searchlights.

543 Thus, we estimate a transformation matrix,  $R_{ij}$ , for each of  $N_{sl}$  searchlights in each

544 subject  $i$ . We then aggregate these searchlight transformation matrices into a whole

545 cortex transformation matrix,  $R_{iA}$  (details below):

546 equation 2. 
$$R_{iA} = f(R_{ij})$$

547 The whole cortex common model data matrix,  $M$ , is created by transforming

548 individual whole cortex data matrices,  $B_{iA}$ , into common model space coordinates and

549 calculating the mean:

550

equation 3. 
$$M = (1/N) \sum_{i=1}^N (B_{iA} R_{iA})$$

551 Conversely, other subjects' data in the common model space can be mapped

552 into any subject's individual anatomical space using the transpose of that subject's

553

whole cortex transformation matrix,  $R_{iA}^T$ , producing a data matrix,  $M_i$ , in which the

554 columns are that subject's cortical loci, making it possible to analyze and visualize

555 transformed group data in any subject's anatomical space:

556

equation 4. 
$$M_i = MR_{iA}^T$$

557 In our implementations of hyperalignment, we have used a variant of  
558 Generalized Procrustes Analysis [46,47](described in detail below) to derive orthogonal  
559 transformation matrices for the improper rotations of a brain data matrix from a cortical  
560 field (region of interest or searchlight) to the mean of others' matrices for the same  
561 region to minimize interindividual differences between the transformed individual and  
562 mean data matrices. Aggregation of searchlight transformation matrices,  $R_{ij}$ , produces  
563 a whole cortex transformation matrix,  $R_{iA}$ . Because  $R_{iA}$  is derived from searchlight  
564 transformation matrices,  $R_{ij}$ , it imposes a locality constraint that limits remapping of  
565 brain data to nearby cortical loci (see details below), making the whole cortex  
566 transformation matrix nonorthogonal by design. We also have tested other  
567 hyperalignment algorithms that use alternatives for calculating the transformation  
568 matrices, such as regularized canonical correlation and probabilistic estimation [48,49].  
569 These alternatives are effective but have not yet been extended to aggregate local  
570 transformation matrices for cortical fields into a whole cortex transformation matrix.

571 The dimensionality of the brain and model data matrices is  $n \times m$ , in which  $m$   
572 equals the number of cortical nodes or dimensions in brain and model data matrices —  
573  $B_{ij}$ ,  $B_{iA}$ ,  $M_{ij}$ , and  $M$  — and  $n$  equals the number of data vectors across these  
574 dimensions. The number of data vectors,  $n$ , is set and determined by the number of  
575 connectivity targets for defining connectivity pattern vectors (see details below). For

576 RHA,  $n$  is set by the number of response pattern vectors in an experimental dataset.  
577 The number of cortical loci in a cortical field or searchlight,  $m_{ij}$ , can vary across  
578 subjects. If the number of cortical loci or dimensions differs between subjects or  
579 between an individual subject and the model space, the new subject's data are  
580 transformed into a space with the same dimensionality as the first subject's or the  
581 model's space. The number of cortical loci in the whole cortex model is set at  $m =$   
582 59,412 for HCP data and  $m = 54,034$  for movie data. We also have shown that the  
583 dimensionality of a model for region of interest or searchlight ( $m_i$ ) can be reduced  
584 substantially relative to the dimensionality of individual brain spaces in imaging  
585 datasets ( $m_{ij}$ ),  $m_{Mj} \ll m_{ij}$  [13,16,48]. In the current version of CHA, as in whole cortex  
586 RHA, however, we do not reduce the dimensionality of the model space because these  
587 reduced dimensionality local models are difficult to aggregate into a whole cortex  
588 model.

589 Note that the common model data matrix has two distinct components. The  
590 columns define a common model space, whereas the rows are defined by the  
591 experimental data — either patterns of connectivity to targets elsewhere in the brain  
592 for CHA, or patterns of response for RHA. The space can be illustrated as an  
593 anatomical space insofar as it can be rotated into any individual's cortical loci (equation  
594 4), but there is no "canonical" anatomical space, rather the individuality of each  
595 individual brain is preserved. We illustrate results in the anatomical space of one  
596 subject, the "reference subject", but we also could illustrate the results in other  
597 subjects' anatomical spaces. The special nature of the common space derives from the

598 alignment of functional indices — connectivities and responses — to minimize  
599 interindividual differences and, thereby, discover shared basis functions for the  
600 individually variable functional architecture. These basis functions are the response and  
601 connectivity profiles for model dimensions that model the response and connectivity  
602 profiles of cortical loci in individual brains as linear weighted sums. In other words,  
603 equation 4 models single columns in  $B_i$  as weighted sums of columns in  $M_i$ .

604 Transformation matrices consist only of weights for the projection of individual  
605 brain spaces for cortical fields,  $B_{ip}$ , or the whole cortex,  $B_{iA}$ , into model spaces ( $M_p$ ,  $M$ )  
606 and contain no connectivity or response data. Thus, a transformation matrix can be  
607 applied to any matrix of data vectors in an individual brain space. Similarly, the  
608 transposes of transformation matrices,  $R_{iA}^T$ , can be applied to any data vector in the  
609 model space to project that vector into the cortical topographies of individual brains.  
610 For all applications of the common model, including the validation tests presented  
611 here, the transformation matrices are applied to independent data that played no role  
612 in derivation of the model space and the individual transformation matrix parameters.  
613 This is necessary to avoid overfitting [50]. Transformation matrices derived from  
614 connectivity data also can be applied to response data and vice versa. In other words,  
615 RHA and CHA are complementary methods for deriving a common model of  
616 information spaces in cortex, and RHA-derived and CHA-derived transformation  
617 matrices are alternative projections for mapping individual brain data into the same  
618 common model space. Note that each column of the transformation matrix  $R_{iA}$   
619 contains weights for cortical loci in subject  $i$ 's brain. These columns of weights are

620 basis functions for modeling functional topographies in individual brains as linear  
621 weighted sums of topographies associated with model dimension functional profiles.

622 *Derivation of transformation matrices for regions of interest and searchlights.* The  
623 derivation of individual transformation matrices that map individual brain spaces into  
624 the common model space is a three-level iterative process. We present the iterative  
625 algorithm for deriving transformation matrices and the common model space in greater  
626 detail here to help readers understand better its structure.

627 In the first step of the first level, the data matrix for a cortical field in one subject,  
628  $B_{2j}$ , is transformed to be in optimal alignment with the same cortical field in another  
629 subject's brain,  $B_{1j}$ , referred to here as the reference subject:

630 equation 5. 
$$\operatorname{argmin} \|B_{2j} R_{2j(\text{level}1)} - B_{1j}\|_F$$

631 We use the Procrustes transformation to find the orthogonal matrix that affords  
632 the optimal improper rotation to achieve this minimization [46]. Note that this  
633 "rotation" is a rotation of data in the high-dimensional feature space, not a rotation in a  
634 two or three dimensional anatomical space. Elsewhere we have shown that other  
635 algorithms can be used to achieve this minimization [48,49].

636 In the following steps of the first level, the brain data matrices for the third and  
637 subsequent subjects are transformed to be in optimal alignment with the matrix  
638 defined by the mean of the previous subject's matrix and the previous mean:

639

equation 6. 
$$\operatorname{argmin} \|B_{ij}R_{ij(\text{level}1)} - M_{i-1j(\text{level}1)}\|_F$$

640

where

641

equation 7. 
$$M_{i-1j(\text{level}1)} = (B_{i-1j}R_{i-1j(\text{level}1)} + M_{i-2j(\text{level}1)})/2$$

642

$M_{i-1j(\text{level}1)}$  is the target data used to hyperalign the current subject's data,  $B_{ij}$ ,

643

and  $M_{i-2j(\text{level}1)}$  is the target data used to hyperalign the previous subject's data,  $B_{i-1,j}$ .

644

Target data is updated with previous subjects' aligned data in this first level. In the

645

subsequent two levels each subject's data matrix is hyperaligned to the simple,

646

unweighted mean of all other subjects' matrices.

647

At the end of the first level, level one transformation matrices have been derived

648

for all cortical fields in all subjects,  $R_{i,j(\text{level}1)}$ , which are used to project each subjects'

649

brain data into the provisional common spaces that evolved over level one iterations

650

$M_{ij(\text{level}1)}$ . Each subject is then re-hyperaligned to the mean data matrix for all other

651

subjects' transformed data from level one to derive new individual transformation

652

matrices,  $R_{ij(\text{level}2)}$ . Note that the new transformation matrices are derived using each

653

subject's original brain data,  $B_{ij}$ . Note also that the mean matrices in provisional

654

common spaces,  $M_{-i,j(\text{level}1)}$ , exclude data from the subject being hyperaligned:



655

equation 8. 
$$\operatorname{argmin} \sum_{i=1}^N \|B_{ij} R_{ij(\text{level}2)} - M_{-i,j(\text{level}1)}\|_F$$

656

where  $M_{-i,j(\text{level}1)}$  is the equally-weighted mean of level one transformed data for all

657

subjects but subject  $i$ :

658

equation 9. 
$$M_{-i,j(\text{level}1)} = (1/(N - 1)) \sum_{k=1(-i)}^N (B_{kj} R_{kj(\text{level}1)})$$

659

After the level two transformation matrices,  $R_{ij(\text{level}2)}$ , are calculated for each

660

subject, the level one transformation matrices are discarded, and the group mean of

661

transformed individual brain data matrices is recalculated, using these new

662

transformation matrices, producing the model matrix,  $M$ :

663

equation 10. 
$$M_j = (1/N) \sum_{i=1}^N B_{ij} R_{ij(\text{level}2)}$$

664

In level 3, the last level, the final searchlight transformation matrices,  $R_{ij}$ , are

665

recalculated for each subject (see equation 1 above).

666

*Derivation of whole cortex transformation matrices.* Orthogonal transformation

667

matrices for hyperaligning a cortical field can map information from a cortical locus into

668

model dimensions anywhere else in that cortical field. To constrain the remapping of

669 information to nearby locations in the reference subject's cortical anatomy, we  
670 developed a searchlight-based approach [16]. We hyperalign the data in  $N_{sl}$   
671 overlapping searchlights, where  $N_{sl}$  is the number of searchlights (59,412 for HCP data,  
672 20,484 for movie data). The number of model dimensions in each searchlight  
673 transformation matrix is determined in the movie data by cortical location and the  
674 number of selected features in the reference subject (mean = 235) and in HCP data by  
675 the cortical location of the searchlight (mean = 337). The transformation for each  
676 searchlight,  $R_{ij}$ , has dimensionality that corresponds to the number of nodes in an  
677 individual's searchlight ( $m_{ij}$  rows) and the number model dimensions in that searchlight,  
678 derived from the reference subject's anatomy ( $m_{ij}$  rows). Thus, each transformation  
679 matrix has on the order of 28K and 57K free parameters for movie data and HCP data,  
680 respectively. Because the searchlights are overlapping, there are multiple estimates of  
681 weights for mapping each cortical locus to each model dimension. As described in  
682 Guntupalli et al. [16] these weights are aggregated across searchlights by adding all  
683 weights for each cortical-locus-to-model-dimension mapping. In essence, this is  
684 equivalent to creating a whole cortex transformation matrix,  $R_{iA}$ , of dimensionality  $m \times$   
685  $m$ , by padding each searchlight transformation matrix,  $R_{ij}$ , with zeroes in all rows and  
686 columns for cortical loci and model dimensions that are not in the individual or model  
687 searchlight cortical field to give them the same dimensionality to produce  $R_{ij(padded)}$ ,  
688 and then summing these padded transformation matrices. Thus, for each subject,  $i$ :  
689

equation 11. 
$$R_{iA} = \sum_{j=1}^{N_{sl}} R_{ij(padded)}$$

690 where  $N_{sl}$  is the number of searchlights and  $R_{ij(padded)}$  is the padded transformation  
691 matrix for subject  $i$  in searchlight  $j$  with dimensionality  $m \times m$ . As noted above,  $m$  is  
692 the number of cortical loci — 59,412 surface nodes for HCP data and 54,034 voxels in  
693 the gray matter mask for movie data — and the number of whole cortex model  
694 dimensions. Because the searchlight approach constrains  
695 cortical-locus-to-model-dimension mapping to nearby cortical locations, the whole  
696 cortex transformation matrix,  $R_{iA}$ , is sparse with zero weights for all mappings of  
697 cortical loci to model dimensions that are separated by more than 2x the searchlight  
698 diameter (~4 cm in this implementation). The whole cortex transformation matrices,  
699  $R_{iA}$ , are large ( $m \times m$ ) but sparse. 98.7% of the entries are zeros, and roughly 20 million  
700 entries have nonzero values in each of these matrices. The additive aggregation of  
701 mapping parameters weights nearby cortical location pairs, which co-occur in more  
702 searchlights than distant pairs, more strongly than distant pairs, adding a further locality  
703 constraint. Note that the searchlight transformation matrices,  $R_{ij}$ , are orthogonal but  
704 the whole cortex transformation matrices,  $R_{iA}$ , are not by design, to introduce the  
705 locality constraint. The whole cortex transformation matrices,  $R_{iA}$ , are used in all  
706 validation tests to hyperalign independent new data matrices after normalizing the  
707 data in each cortical node or voxel. In other words, all validation tests are performed  
708 on independent data that played no role in deriving the transformation matrix  
709 parameters or the common model connectome, providing cross-validated  
710 generalization testing. CHA of movie data was based on one half of the movie data

711 (~55 min, ~1300 TRs) and the other, independent half of the movie data was used for  
712 validation tests with two-fold cross-validation. CHA of HCP data was based on one  
713 session of resting state data (~15 min, 1200 TRs) and a second session of independent  
714 resting state data was used for validation tests, as well as independent data from task  
715 fMRI [18].

716 Note that transformations map the cortical loci of a subject's data matrices  
717 (columns) into the reference subject's cortical loci. Thus, we use the reference subject's  
718 cortex for illustration, but note that the anatomical coordinates for model dimensions  
719 are an abstraction, as even the reference subject's data are mapped into model space  
720 coordinates with a transformation matrix that is not the identity matrix. Data matrices  
721 in the model space also can be mapped into any subject's cortical anatomy by using  
722 the transpose of that subject's transformation matrix (equation 4). Thus, the  
723 hyperaligned data in the common model space can be illustrated in any subject's  
724 anatomical space. The anatomical space that we use for illustration, that of the  
725 reference subject, should not be considered a canonical space but, rather, simply as  
726 one of many possible physical instantiations.

727 *Connectivity targets.* We define functional connectivities as the correlations of the  
728 response profiles — series of responses across time — of cortical loci or dimensions  
729 with the response profiles of targets ( $t_j$ ) distributed across the cortex. We use two sets  
730 of connectivity targets, one reduced set to derive the transformation matrices and  
731 common model connectivity data matrix, and a more complete set to test the validity  
732 of the model. We define a reduced set of connectivity targets using surface-searchlight

733 target ROIs to make derivation of the model more computationally tractable, as  
734 compared to using all cortical loci as individual connectivity targets. For the reduced  
735 set, we use 3852 targets (top 3 components for 1284 searchlights; note that the  
736 searchlights for connectivity targets are different from the searchlights that are  
737 hyperaligned as described above in the Resting State Data and Movie Data sections;  
738 see details for defining searchlight PC connectivity targets in the next section). For  
739 validation testing we analyze the full connectome, defining connectivity targets as all  
740 cortical loci in the brain ( $N_{cl} = 54,034$  gray matter voxels in the movie data and 59,412  
741 cortical nodes in the HCP resting state data).

742 *Searchlight ROI connectivity targets.* Each surface-searchlight connectivity target has a  
743 radius of 13 mm and is centered on a node of a coarse surface with a total of 1284  
744 nodes covering both hemispheres. Thus, neighboring connectivity targets searchlights  
745 are overlapping. Unlike others (e.g., [5]) we do not assume that a searchlight  
746 connectivity target has a single response profile. We find, rather, a variety of response  
747 profiles for individual cortical loci in a target searchlight that can be captured as  
748 principal components. We used the top three principal components to represent the  
749 response profiles in a target searchlight.

750 To insure that the top components in target searchlights capture the same  
751 connectivity patterns across subjects, we performed a singular value decomposition  
752 (SVD) on the group mean connectivity matrix for each target searchlight after a  
753 simplified hyperalignment of individual matrices. Note that using a naive PCA/SVD to  
754 derive top components in each subject's searchlight independently will not guarantee

755 their functional similarity. Target searchlights had a mean of 142 loci (HCP data) or 99  
756 voxels (movie data). At this stage it was not yet possible to break the response profiles  
757 for searchlight targets into multiple components with shared connectivity profiles.  
758 Consequently, connectivity targets for the procedure to derive these components were  
759 simply the mean time-series responses for target searchlights. For each target  
760 searchlight with  $N_s$  features (surface nodes or voxels), we computed a  $1284 \times N_s$   
761 correlation matrix (the correlations between each cortical locus in the target searchlight  
762 and the mean time series for all target searchlights) for each subject. We hyperaligned  
763 the features (cortical loci) in each target searchlight across subjects based on these  
764 matrices and calculated the mean correlation matrix after hyperalignment in each  
765 target searchlight. We then performed a singular value decomposition (SVD) of each  
766 searchlight's group mean matrix to obtain the top three components that explained the  
767 most shared variance. Each of these components is a weighted sum of cortical loci in a  
768 target searchlight for each subject, and these weights afford calculation of a time-series  
769 response whose connectivity profile with other targets is shared across subjects. Each  
770 individual subject's time-series responses for the top three components were then used  
771 as target response profiles for CHA. This step gave us  $1284 \times 3 = 3852$  target response  
772 profiles in each subject's cortex.

773

### Validation tests and statistical analyses

774 *Functional ROIs.* In addition to analyzing the results of validation tests in each feature  
775 or searchlight across the whole cortex, we also examined the results of validation tests  
776 in functional ROIs associated with different sensory, perceptual, and cognitive functions

777 to assess the general validity of the common model [16]. We searched for terms and  
778 cortical areas implicated in visual, auditory, cognitive, and social functions in  
779 NeuroSynth [22] and took the coordinates for the peak location associated with each of  
780 24 terms (Supplementary Table 1). For validation testing using the movie dataset, we  
781 used volume searchlights centered around those peak loci with a radius of 3 voxels as  
782 our functional ROIs. For validation testing using the HCP dataset, we found the closest  
783 surface node corresponding to each peak locus and used a surface searchlight with a  
784 10 mm radius around that surface node as the functional ROI. Functional ROIs that  
785 were medial and encompassing both hemispheres in the volume space were split into  
786 left and right ROIs in the surface space resulting in 26 ROIs for tests on the HCP data.  
787 For analyses of ISCs and PSFs of connectivity profiles in functional ROIs, we calculated  
788 the mean ISC or PSF across all cortical loci within the ROI searchlights (Figs. 3C, 4D,  
789 5A, and 5C).

790 *Statistics.* We used bootstrapping to test for significance of the contrasts between  
791 alignment methods by sampling subjects 10,000 times to compute 95% CIs using  
792 BootES [51]. We did this for each ROI and for the mean of all ROIs separately. We used  
793 the same bootstrapping procedure for all validation tests unless specified otherwise.

794 *Control for effect of filtering.* In addition to the anatomically-aligned movie data and  
795 MSM-All aligned HCP resting state fMRI data, we calculated a third dataset that  
796 controls for the effect of filtering the data through CHA transformations but aligns  
797 those filtered data across subjects based on anatomical or MSM-All alignment. To  
798 produce the filter control data, we created multiple common model connectomes

799 using each subject as the reference. Each subject's connectome was transformed into  
800 the common connectome whose reference subject was the next subject in our order of  
801 subjects. The last subject's connectome was transformed into the common model  
802 connectome whose reference brain was that of the first subject. Thus, each subject's  
803 connectome is filtered by hyperalignment, but since the common model connectome  
804 for each subject has a different reference, the correspondence across filtered  
805 connectomes is based only on anatomical alignment and preserves the anatomical  
806 variability in the movie data and HCP datasets.

807 *Intersubject correlation (ISC) of connectivity profile vectors.* For validity testing we  
808 applied a more detailed definition of the connectome to measure fine-grained  
809 structure. The connectivity profile vector for a feature (or a cortical node or voxel) was  
810 defined as the correlation of its time-series with of all other cortical nodes or voxels.  
811 ISCs of connectivity profiles were computed between each subject's connectivity  
812 profiles and the average connectivity profiles of all other subjects in each cortical locus.

813 For the movie data ISCs of connectivity profiles were computed within each  
814 movie half separately and before and after CHA based on the other half of the movie.  
815 Correlation values were Fisher transformed before averaging across both halves of the  
816 movie in each voxel. These were then averaged across all subjects and inverse Fisher  
817 transformed before mapping onto the cortical surface for visualization. ISCs of resting  
818 state connectivity profiles were computed for session REST2. Session REST1 was used  
819 for deriving the common model connectome and transformation matrices. ISCs were  
820 calculated for data mapped into the common model connectome, for movie data



821 aligned anatomically, for HCP resting state data aligned with MSM-All, and for filter  
822 control movie and HCP data.

823 We also computed within-subject between-session (REST1 and REST2)  
824 correlation of resting state connectivity profiles. Within-subject between-sessions  
825 correlations were calculated on data that are transformed by CHA as used for our main  
826 analyses.

827 *Spatial point spread function.* To investigate the spatial granularity of representation,  
828 we computed a spatial point spread function (PSF) of ISCs or WSCs of connectivity  
829 profiles. We computed the correlation of connectivity profiles in each cortical locus  
830 (surface node or voxel) with the average connectivity profiles of cortical loci at varying  
831 cortical distances in other subjects' data. To account for the effect of filtering, we did  
832 this analyses with filter control data that were filtered with CHA but aligned based on  
833 anatomy and MSM-All and after CHA with each subject aligned to the same reference  
834 subject [16]. We computed similar PSFs for connectivity profiles within-subject  
835 between-sessions (REST1 and REST2). This was also performed after CHA to account  
836 for any filtering effects but to a single common space as used for our main analyses.

837 *ISC of representational geometry.* ISCs of similarity structures were computed within  
838 each movie half separately using a searchlight of 3 voxel radius. The mean number of  
839 voxels in these searchlights was 102. In each searchlight, similarity structure was  
840 computed as a matrix of correlation coefficients between patterns of response for every  
841 pair of time-points from that movie half for each subject. The flattened upper triangle  
842 of this matrix excluding the diagonal was extracted as the profile of representational

843 geometry at each searchlight for each subject. ISC of representational geometry in  
844 each searchlight was computed as the correlation between each subject's  
845 representational geometry and the average of all other subjects' representational  
846 geometries for that searchlight. Correlation values were Fisher transformed before  
847 averaging across both movie halves in each voxel. These were then averaged across all  
848 subject-average pairs and inverse Fisher transformed before mapping onto the cortical  
849 surface for visualization. The same steps were performed to compute inter-subject  
850 correlation of representational similarity before and after hyperalignment.

851 *Between-subject multivariate pattern classification (bsMVPC)*. bsMVPC of 15 s movie  
852 time segments (6 TRs) was computed within each movie half separately using  
853 searchlights of 3 voxel radius, as in the analysis of representational geometry. bsMVPC  
854 was performed using a one-nearest neighbor classifier based on correlation distance  
855 [12,16]. Each 15 s (6TR) sequence of brain data for an individual was compared to other  
856 subjects' mean responses to that sequence and all other 15 s sequences in the same  
857 movie half using a sliding time window, resulting in over 1300 alternative time  
858 segments (chance classification accuracy < 0.1%). Classification accuracies in each  
859 searchlight were averaged across both halves in each subject before mapping the  
860 subject means onto searchlight center voxels on the cortical surface for visualization.

861 We implemented our methods and ran our analyses in PyMVPA  
862 [45](<http://www.pymvpa.org>) unless otherwise specified. All preprocessing and analyses  
863 were carried out on a 64-bit Debian 7.0 (wheezy) system with additional software from  
864 NeuroDebian [52](<http://neuro.debian.net>).

865

## Acknowledgements

866 We would like to thank Yaroslav O. Halchenko, Michael Hanke, Sam Nastase, and  
867 Nikolaas O. Oosterhof for discussion and software support. This work was supported  
868 by grants from the National Institute of Mental Health (R01MH075706) and the  
869 National Science Foundation (NSF1129764 and NSF1607845). Resting state and task  
870 fMRI data were provided by the Human Connectome Project, WU-Minn Consortium  
871 (Principal Investigators: David Van Essen and Kamil Ugurbil; 1U54MH091657) funded  
872 by the 16 NIH Institutes and Centers that support the NIH Blueprint for Neuroscience  
873 Research; and by the McDonnell Center for Systems Neuroscience at Washington  
874 University.

875 **References**

- 876 1. Biswal B, Yetkin FZ, Haughton VM, Hyde JS. Functional connectivity in the motor  
877 cortex of resting human brain using echo-planar MRI. *Magn Reson Med*. 1995;34:  
878 537–541.
- 879 2. Smith SM, Vidaurre D, Beckmann CF, Glasser MF, Jenkinson M, Miller KL, et al.  
880 Functional connectomics from resting-state fMRI. *Trends in Cognitive Sciences*.  
881 2013;17: 666–682.
- 882 3. Hutchison RM, Womelsdorf T, Allen EA, Bandettini PA, Calhoun VD, Corbetta M, et  
883 al. Dynamic functional connectivity: Promise, issues, and interpretations.  
884 *NeuroImage*. 2013;80: 360–378.
- 885 4. Sporns O, Chialvo DR, Kaiser M, Hilgetag CC. Organization, development and  
886 function of complex brain networks. *Trends in Cognitive Sciences*. 2004;8: 418–425.
- 887 5. Thomas Yeo BT, Krienen FM, Sepulcre J, Sabuncu MR, Lashkari D, Hollinshead M, et  
888 al. The organization of the human cerebral cortex estimated by intrinsic functional  
889 connectivity. *Journal of Neurophysiology*. 2011;106: 1125–1165.
- 890 6. Wig GS, Laumann TO, Cohen AL, Power JD, Nelson SM, Glasser MF, et al.  
891 Parcellating an Individual Subject’s Cortical and Subcortical Brain Structures Using  
892 Snowball Sampling of Resting-State Correlations. *Cereb Cortex*. 2014;24:  
893 2036–2054.
- 894 7. Laumann TO, Gordon EM, Adeyemo B, Snyder AZ, Joo SJ, Chen M-Y, et al.

- 895 Functional System and Areal Organization of a Highly Sampled Individual Human  
896 Brain. *Neuron*. 2015;87: 657–670.
- 897 8. Gordon EM, Laumann TO, Adeyemo B, Petersen SE. Individual Variability of the  
898 System-Level Organization of the Human Brain. *Cereb Cortex*. 2017;27: 386–399.
- 899 9. Glasser MF, Coalson TS, Robinson EC, Hacker CD, Harwell J, Yacoub E, et al. A  
900 multi-modal parcellation of human cerebral cortex. *Nature*. 2016;536: 171–178.
- 901 10. Gordon EM, Laumann TO, Adeyemo B, Huckins JF, Kelley WM, Petersen SE.  
902 Generation and Evaluation of a Cortical Area Parcellation from Resting-State  
903 Correlations. *Cereb Cortex*. 2016;26: 288–303.
- 904 11. Cohen AL, Fair DA, Dosenbach NUF, Miezin FM, Dierker D, Van Essen DC, et al.  
905 Defining functional areas in individual human brains using resting functional  
906 connectivity MRI. *NeuroImage*. 2008;41: 45–57.
- 907 12. Haxby JV, Gobbini MI, Furey ML, Ishai A, Schouten JL, Pietrini P. Distributed and  
908 Overlapping Representations of Faces and Objects in Ventral Temporal Cortex.  
909 *Science*. 2001;293: 2425–2430.
- 910 13. Haxby JV, Guntupalli JS, Connolly AC, Halchenko YO, Conroy BR, Gobbini MI, et  
911 al. A Common, High-Dimensional Model of the Representational Space in Human  
912 Ventral Temporal Cortex. *Neuron*. 2011;72: 404–416.
- 913 14. Haxby JV, Connolly AC, Guntupalli JS. Decoding Neural Representational Spaces  
914 Using Multivariate Pattern Analysis. *Annual Review of Neuroscience*. 2014;37:

- 915 435–456.
- 916 15. Grill-Spector K, Weiner KS. The functional architecture of the ventral temporal  
917 cortex and its role in categorization. *Nat Rev Neurosci.* 2014;15: 536–548.
- 918 16. Guntupalli JS, Hanke M, Halchenko YO, Connolly AC, Ramadge PJ, Haxby JV. A  
919 Model of Representational Spaces in Human Cortex. *Cereb Cortex.* 2016;26:  
920 2919–2934.
- 921 17. Norman KA, Polyn SM, Detre GJ, Haxby JV. Beyond mind-reading: multi-voxel  
922 pattern analysis of fMRI data. *Trends in Cognitive Sciences.* 2006;10: 424–430.
- 923 18. Barch DM, Burgess GC, Harms MP, Petersen SE, Schlaggar BL, Corbetta M, et al.  
924 Function in the human connectome: Task-fMRI and individual differences in  
925 behavior. *NeuroImage.* 2013;80: 169–189.
- 926 19. Smith SM, Beckmann CF, Andersson J, Auerbach EJ, Bijsterbosch J, Douaud G, et  
927 al. Resting-state fMRI in the Human Connectome Project. *NeuroImage.* 2013;80:  
928 144–168.
- 929 20. Van Essen DC, Smith SM, Barch DM, Behrens TEJ, Yacoub E, Ugurbil K. The  
930 WU-Minn Human Connectome Project: An overview. *NeuroImage.* 2013;80: 62–79.
- 931 21. Yarkoni T, Poldrack RA, Nichols TE, Essen DCV, Wager TD. Large-scale automated  
932 synthesis of human functional neuroimaging data. *Nature Methods.* 2011;8:  
933 665–670.
- 934 22. Robinson EC, Jbabdi S, Glasser MF, Andersson J, Burgess GC, Harms MP, et al.

- 935 MSM: A new flexible framework for Multimodal Surface Matching. *NeuroImage*.  
936 2014;100: 414–426.
- 937 23. Sabuncu M, Singer BD, Conroy B, Bryan RE, Ramadge PJ, Haxby JV.  
938 Function-based intersubject alignment of human cortical anatomy. *Cerebral Cortex*.  
939 2010;20:130-140.
- 940 24. Conroy BR, Singer BD, Haxby JV, Ramadge PR. MRI-Based inter-subject cortical  
941 alignment using functional connectivity. In Y Bengio, D Schuurmans, J Lafferty, CKI  
942 Williams, A Culotta (eds), *Advances in Neural Information Processing Systems 22*.  
943 2009: pp 378-386.
- 944 25. Conroy BR, Singer BD, Guntupalli JS, Ramadge PR, Haxby JV. Inter-subject  
945 alignment of human cortical anatomy using functional connectivity. *Neuroimage*.  
946 2013;81:400-411.
- 947 26. Guntupalli JS, Wheeler KG, Gobbini MI. Disentangling the representation of  
948 identity from head view along the human face processing pathway. *Cerebral*  
949 *Cortex*. 2017;27:46-53.
- 950 27. Connolly AC, Sha L, Guntupalli JS, Oosterhof N, Halchenko YO, Nastase SA, et al.  
951 How the Human Brain Represents Perceived Dangerousness or “Predacity” of  
952 Animals. *J Neurosci*. 2016;36: 5373–5384.
- 953 28. Visconti di Oleggio Castello M, Halchenko YO, Guntupalli JS, Gors JD, Gobbini MI.  
954 The neural representation of familiar and unfamiliar faces in the distributed system

- 955 for face perception. *Scientific Reports*. 2017;7:12237.
- 956 29. Heinzle J, Kahnt T, Haynes J-D. Topographically specific functional connectivity  
957 between visual field maps in the human brain. *NeuroImage*. 2011;56: 1426–1436.
- 958 30. Jbabdi S, Sotiropoulos SN, Behrens TE. The topographic connectome. *Current*  
959 *Opinion in Neurobiology*. 2013;23: 207–215.
- 960 31. Haak KV, Marquand AF, Beckmann CF. Connectopic mapping with resting-state  
961 fMRI. *Neuroimage*. 2017;epub ahead of print.
- 962 32. Langs G, Sweet A, Lashkari D, Tie Y, Rigolo L, Golby AJ, Golland P. Decoupling  
963 function and anatomy in atlases of functional connectivity patterns: Language  
964 mapping in tumor patients. *Neuroimage*. 2014;103:462-475.
- 965 33. Langs G, Wang D, Golland P, Mueller S, Pan R, Sabuncu MR, Sun W, Li K, Liu H.  
966 Identifying shared networks in individuals by decoupling functional and anatomical  
967 variability. *Cerebral Cortex*. 2016;26:4004-4014.
- 968 34. Beckmann CF, Mackay CE, Filippini N, Smith SM. Group comparison of  
969 resting-state fMRI data using multi-subject ICA and dual regression. *Organization of*  
970 *Human Brain Mapping Abstracts*. 2009.
- 971 35. Filippini N, MacIntosh BJ, Hough MG, Goodwin GM, Frisoni GB, Smith SM, et al.  
972 Distinct patterns of brain activity in young carriers of the APOE-e4 allele.  
973 *Proceedings of the National Academy of Sciences, USA*. 2009;106:7209-7214.
- 974 36. Yacoub E, Harel N, Uğurbil K. High-field fMRI unveils orientation columns in



- 975 humans. PNAS. 2008;105:10607–10612.
- 976 37. Nishimoto S, Vu AT, Naselaris T, Benjamini Y, Yu B, Gallant JL. Reconstructing Visual  
977 Experiences from Brain Activity Evoked by Natural Movies. *Current Biology*.  
978 2011;21: 1641–1646.
- 979 38. Kanwisher N. Functional specificity in the human brain: A window into the  
980 functional architecture of the mind. PNAS. 2010;107: 11163–11170.
- 981 39. Freiwald WA, Tsao DY. Functional Compartmentalization and Viewpoint  
982 Generalization Within the Macaque Face-Processing System. *Science*. 2010;330:  
983 845–851.
- 984 40. Nastase SA, Connolly AC, Oosterhof NN, Halchenko YO, Guntupalli JS, Visconti di  
985 Oleggio Castello M, Gors J, Gobbini MI, Haxby JV. Attention selectively reshapes  
986 the geometry of distributed semantic representation. *Cereb Cortex*. 2017;27:  
987 4277-4291.
- 988 41. DiCarlo JJ, Cox DD. Untangling invariant object recognition. *Trends in Cognitive*  
989 *Sciences*. 2007;11: 333–341.
- 990 42. Cox RW. AFNI: software for analysis and visualization of functional magnetic  
991 resonance neuroimages. *Comput Biomed Res*. 1996;29: 162–173.
- 992 43. Saad ZS, Reynolds RC, Argall B, Japee S, Cox RW. SUMA: an interface for  
993 surface-based intra- and inter-subject analysis with AFNI. *IEEE International*  
994 *Symposium on Biomedical Imaging: Nano to Macro, 2004*. 2004. Vol. 2; pp.

- 995 1510–1513.
- 996 44. Oosterhof NN, Wiestler T, Downing PE, Diedrichsen J. A comparison of  
997 volume-based and surface-based multi-voxel pattern analysis. *NeuroImage*.  
998 2011;56: 593–600
- 999 45. Hanke M, Halchenko YO, Sederberg PB, Hanson SJ, Haxby JV, Pollmann S.  
1000 PyMVPA: A Python toolbox for multivariate pattern analysis of fMRI data.  
1001 *Neuroinformatics*. 2009;7: 37–53.
- 1002 46. Schönemann PH. A generalized solution of the orthogonal procrustes problem.  
1003 *Psychometrika*. 1966;31: 1–10.
- 1004 47. Gower JC. (1975). Generalized procrustes analysis. *Psychometrika*. 1975;40: 33–51.
- 1005 48. Chen P-H, Chen J, Yeshurun Y, Hasson U, Haxby JV, Ramadge PJ. A  
1006 Reduced-dimension fMRI Shared Response Model. Proceedings of the 28th  
1007 International Conference on Neural Information Processing Systems. Cambridge,  
1008 MA, USA: MIT Press; 2015. pp. 460–468.
- 1009 49. Xu H, Lorbert A, Ramadge PJ, Guntupalli JS, Haxby JV. Regularized  
1010 hyperalignment of multi-set fMRI data. 2012 IEEE Statistical Signal Processing  
1011 Workshop (SSP). IEEE; 2012. pp. 229–232.
- 1012 50. Kriegeskorte N, Simmons WK, Bellgowan PSF, Baker CI. Circular analysis in systems  
1013 neuroscience: the dangers of double dipping. *Nat Neurosci*. 2009;12: 535-540.
- 1014 51. Kirby KN, Gerlanc D. BootES: An R package for bootstrap confidence intervals on

1015 effect sizes. Behav Res. 2013;45: 905–927.

1016 52. Halchenko YO, Hanke M. Open is Not Enough. Let's Take the Next Step: An

1017 Integrated, Community-Driven Computing Platform for Neuroscience. Front

1018 Neuroinform. 2012;6.

1019 Supporting information legends

1020 S1 Text. Overview of supplemental data and figures on common model connectome  
1021 based on responses to a movie.

1022 S2 Fig. Spatial granularity of shared connectivity profiles from the movie data. The  
1023 common model connectome based on the movie data produced similar results to the  
1024 common model connectome based on resting state data in terms of ISC of connectivity  
1025 profiles (Fig 5) and the spatial granularity, as indexed by the PSF of ISCs. (A) Mean PSF  
1026 slopes in functional ROIs. (B) Mean PSF across all ROIs.

1027 S3 Fig. ISC of representational geometries in the responses to movie time-points.  
1028 Analysis procedure was identical to Fig 4 with results after RHA included for  
1029 comparison. (A) ISC of representational geometry in each voxel mapped onto cortical  
1030 surfaces after anatomical alignment, RHA, and CHA. (B) ISC of representational  
1031 geometries in 24 functional ROIs and their mean after anatomical alignment and in the  
1032 common model connectome. Bootstrapped testing showed significantly higher ISCs of  
1033 representational geometry after both CHA and RHA relative to anatomical alignment in  
1034 all ROIs, and some differences after CHA and RHA ("-" : CHA<RHA; "ns" : no  
1035 significant difference between ISCs after CHA and RHA; "+" : CHA>RHA). CHA  
1036 increased the ISC of representational geometry in all of the ROIs (ROI mean ISC=0.291)  
1037 relative to anatomical alignment (ISC=0.173) (difference=0.118 [0.103, 0.129]), but the  
1038 increase is slightly, but significantly, less than that provided by RHA (ISC=0.306)  
1039 (difference=0.015 [0.009, 0.019]).

1040 S4 Fig. Between-subject classification of movie segments. Analysis procedure was  
1041 identical to Fig 4 with results after RHA included for comparison. (A) Classification  
1042 accuracies in each searchlight mapped on cortical surfaces after anatomical alignment,  
1043 RHA, and CHA. (B) Classification accuracies in 24 ROIs covering visual, auditory,  
1044 cognitive, and social systems across the cortex and their mean after anatomical

1045 alignment, RHA, and CHA. Bootstrapped testing showed significant, six to seven-fold  
1046 higher accuracies after both the hyperalignment methods relative to anatomical  
1047 alignment (ROI mean bsMVPC is 1.74%, 12.95%, 9.93% after anatomical alignment,  
1048 RHA, and CHA, respectively and slightly but significantly higher accuracies after RHA  
1049 relative to CHA (mean difference = 3.02% [2.52%, 3.40%]). (C) Classification accuracies  
1050 using information from multiple systems across the whole cortex. Dimensionality of the  
1051 data is reduced using SVD and classification is performed with different set sizes of top  
1052 singular vectors. Peak accuracy is reached after 200 dimensions for hyperaligned data  
1053 and at 50 dimensions for anatomically aligned data. Peak accuracy after RHA is 92.98%  
1054 and after CHA is 89.61% (mean difference = 3.37% [2.32%, 4.99%]).

1055 S5 Fig. ISC of HCP task activation and contrast maps. Connectivity hyperalignment  
1056 parameters derived from a session of resting state data were applied to the task maps  
1057 and the correlation of these maps is computed between each subject and the average  
1058 of others before and after hyperalignment. Hyperalignment improved correlations on  
1059 average across all tasks and in all but two (Face-Shapes and Body-Average, labeled ns)  
1060 individual task maps. The average correlation across task maps increased from 0.58 to  
1061 0.65 (mean difference = 0.07 [0.06, 0.08]).

1062 S6 Table. Selected cortical loci implicated in visual, auditory, cognitive, and social  
1063 functions from Neurosynth.

1064 S7 Table. Task maps used from the HCP data.

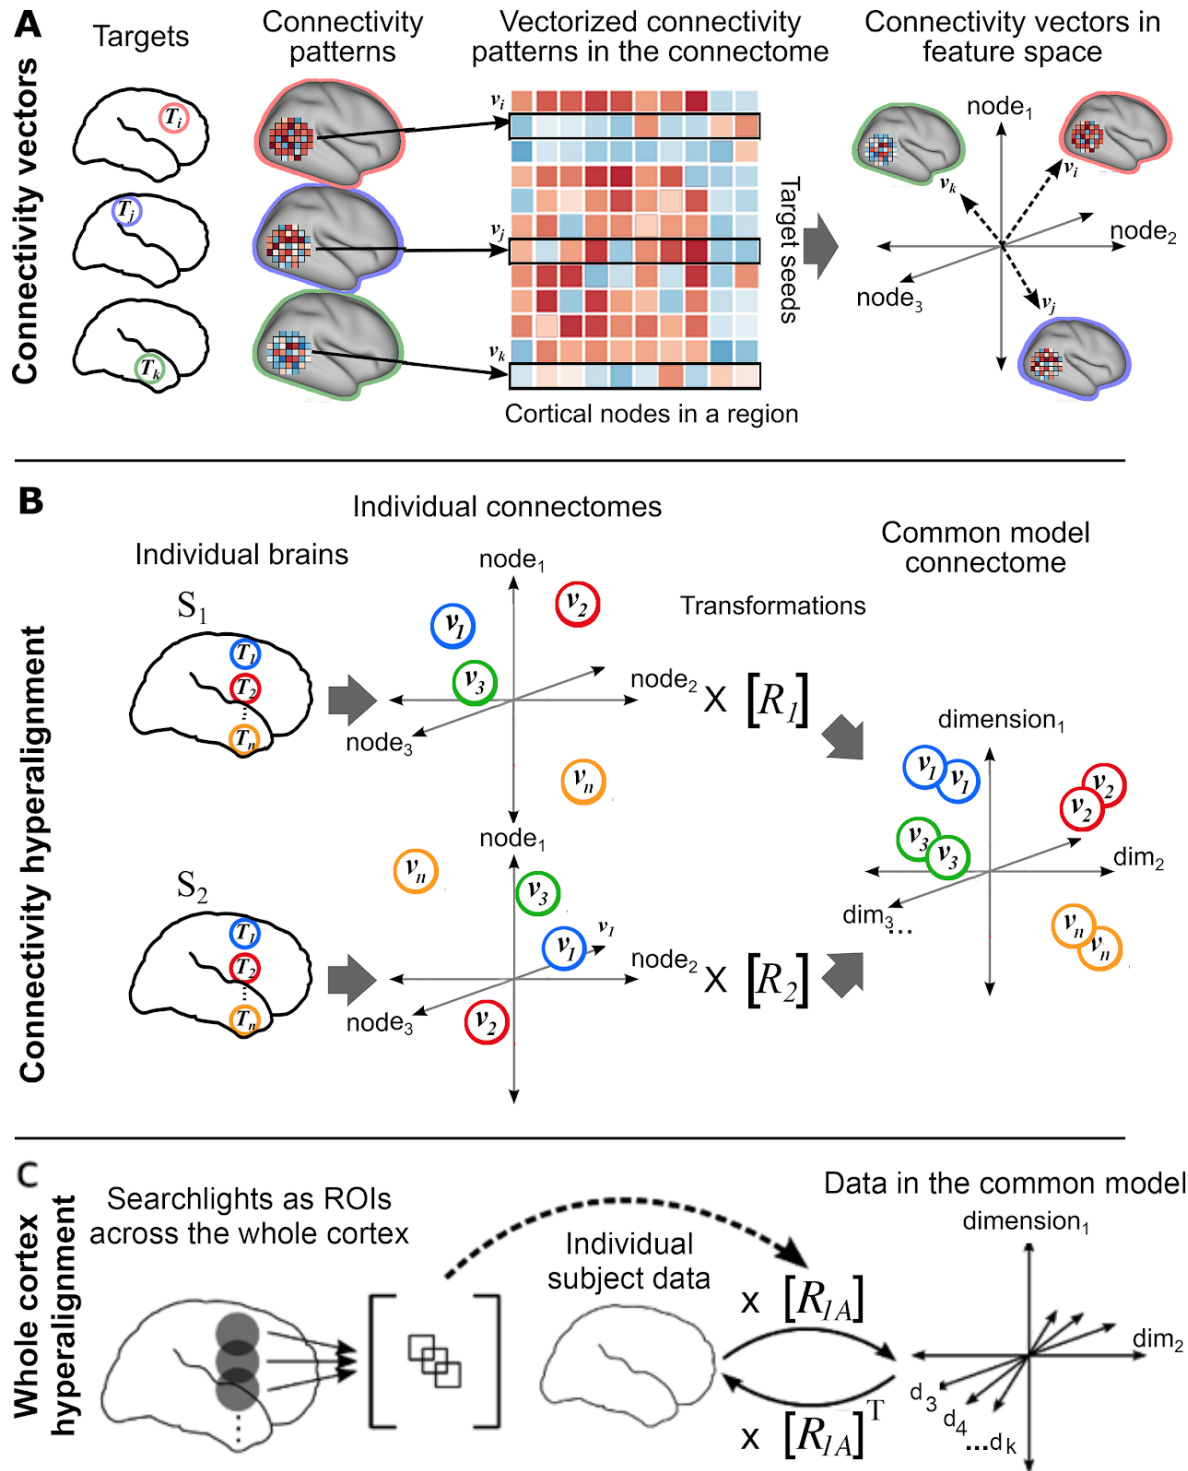

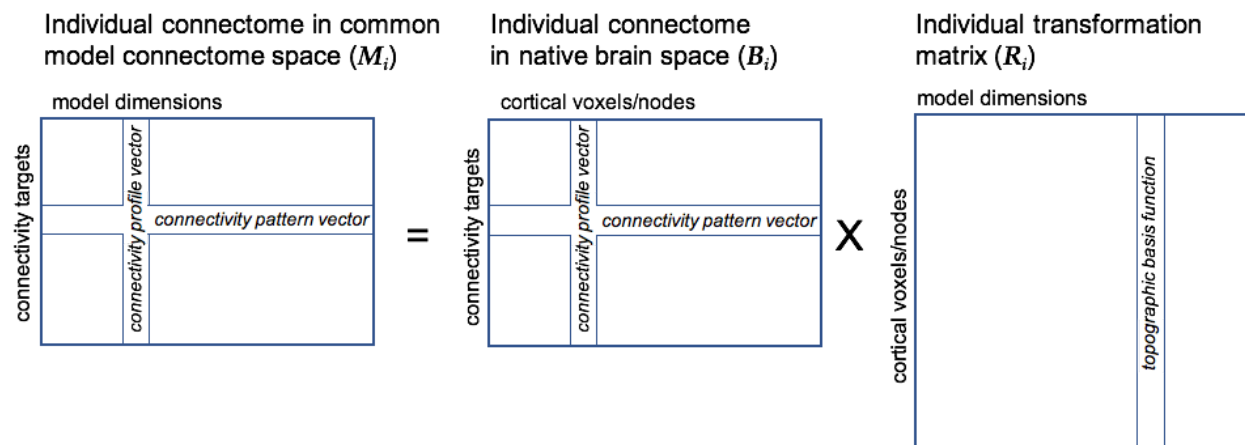

1066

Figure 2

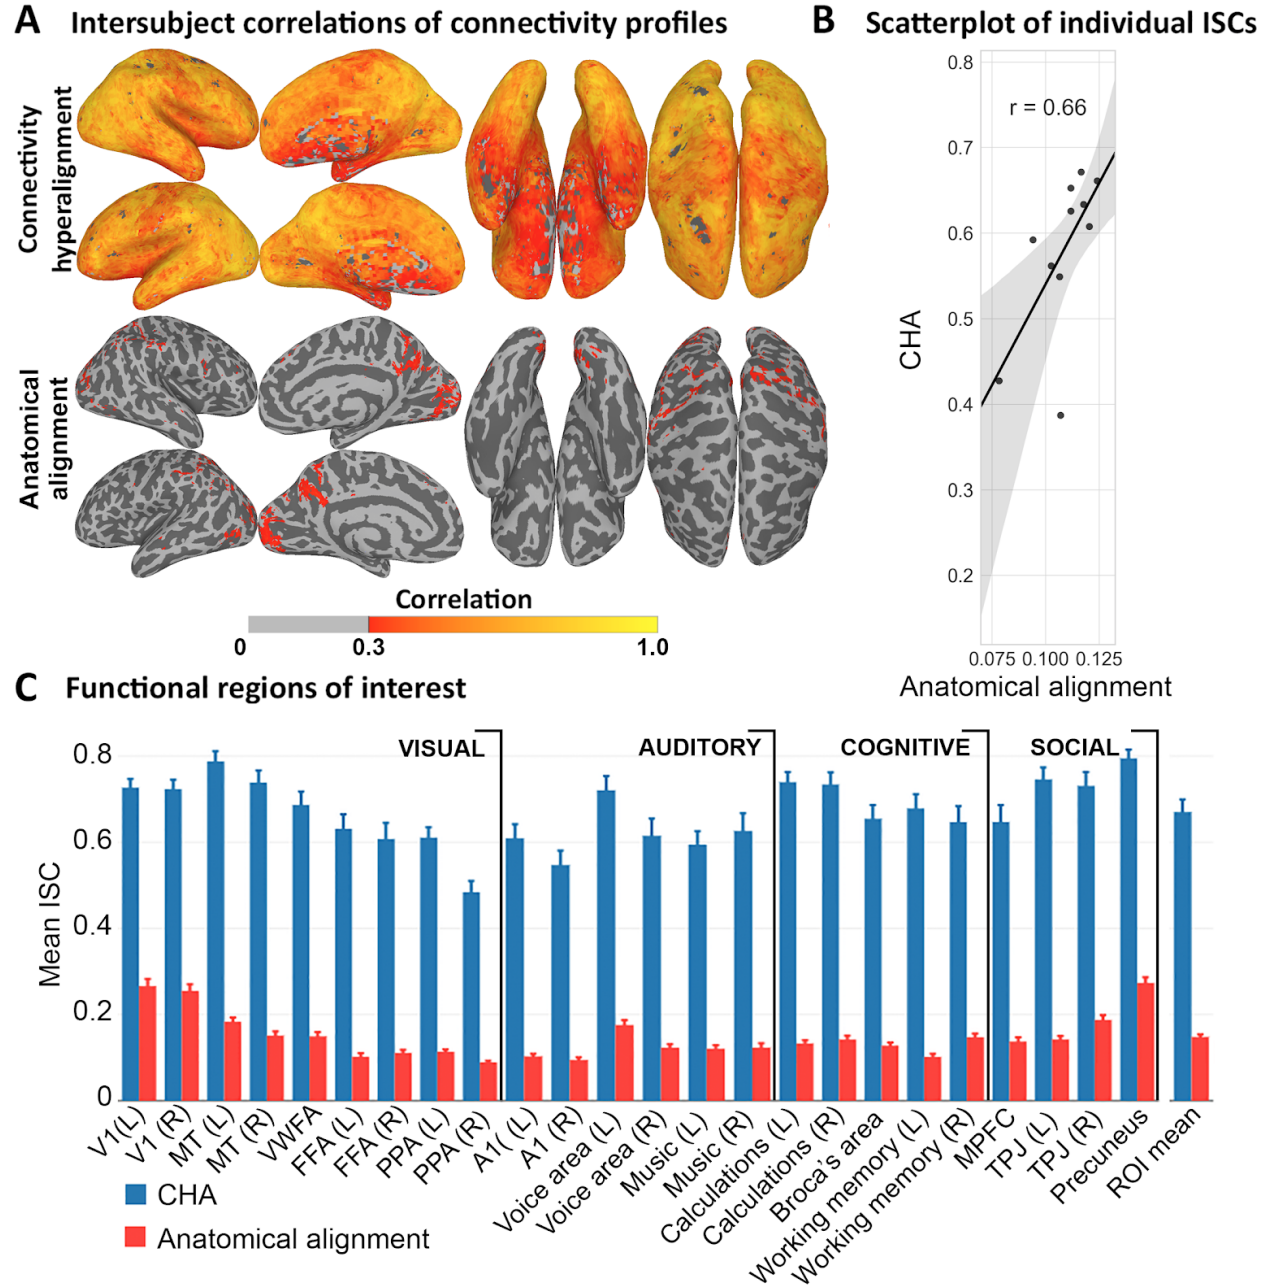



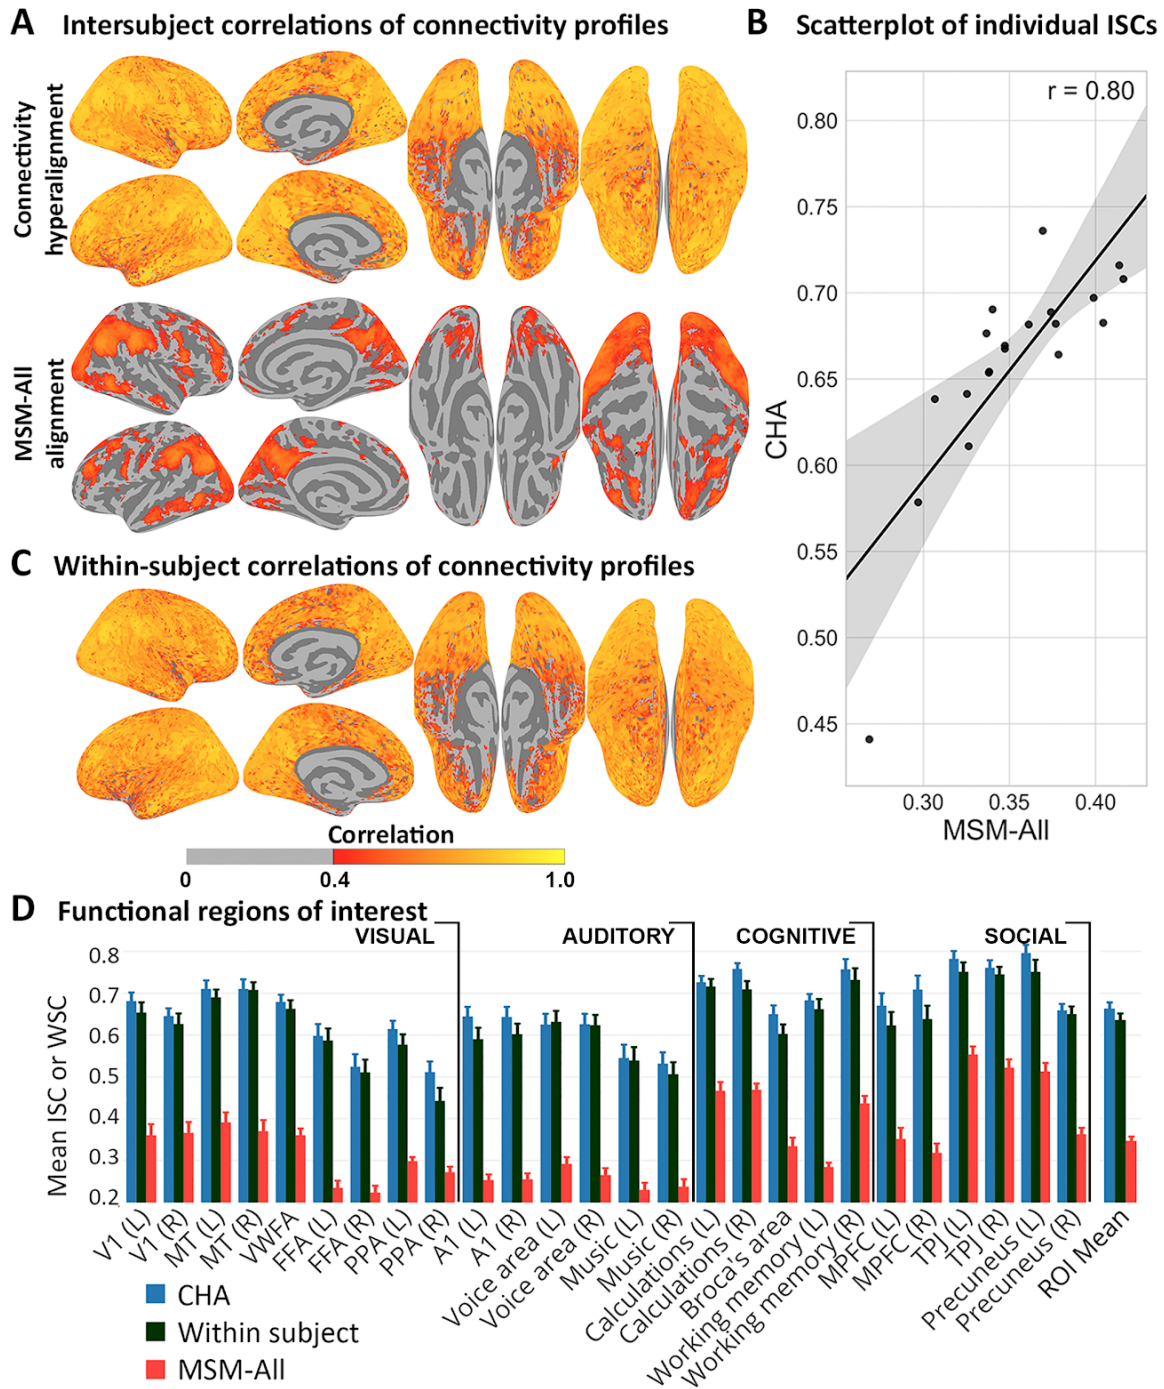

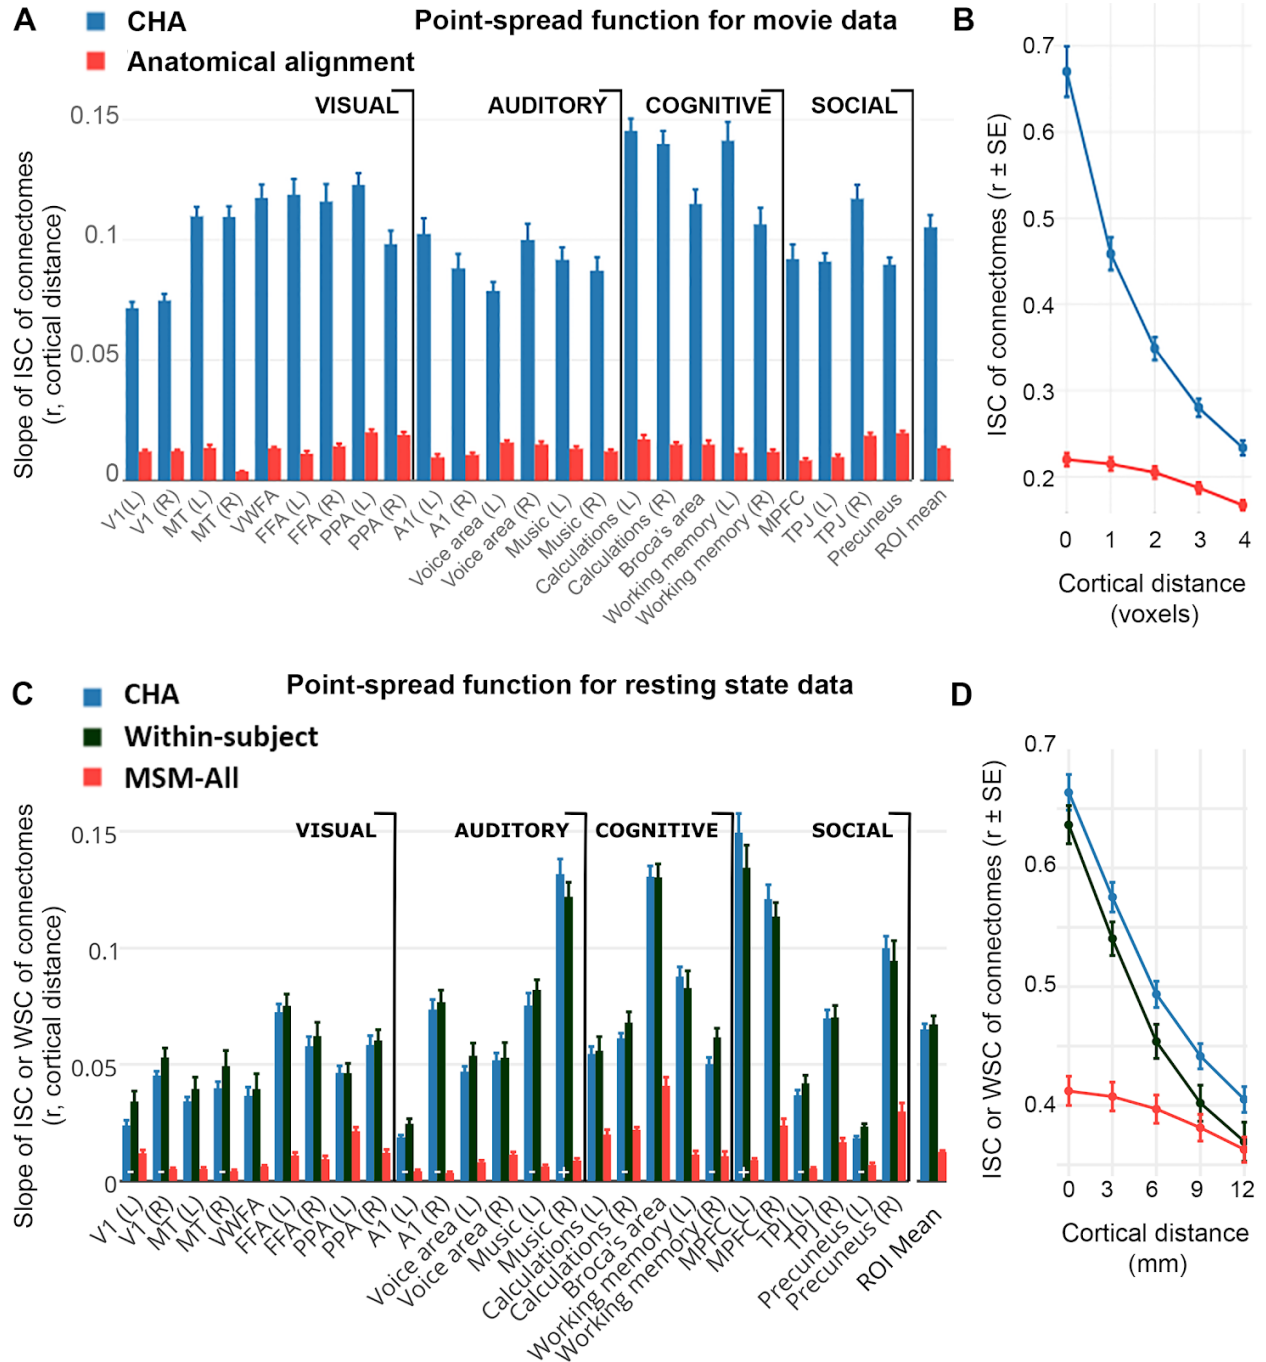

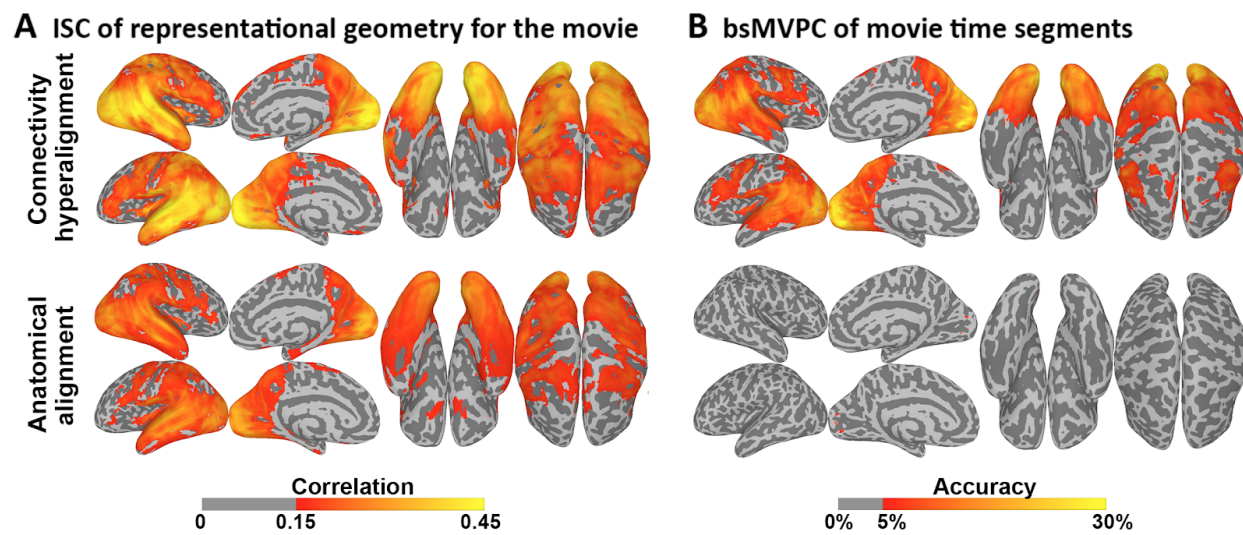

1070

Figure 6

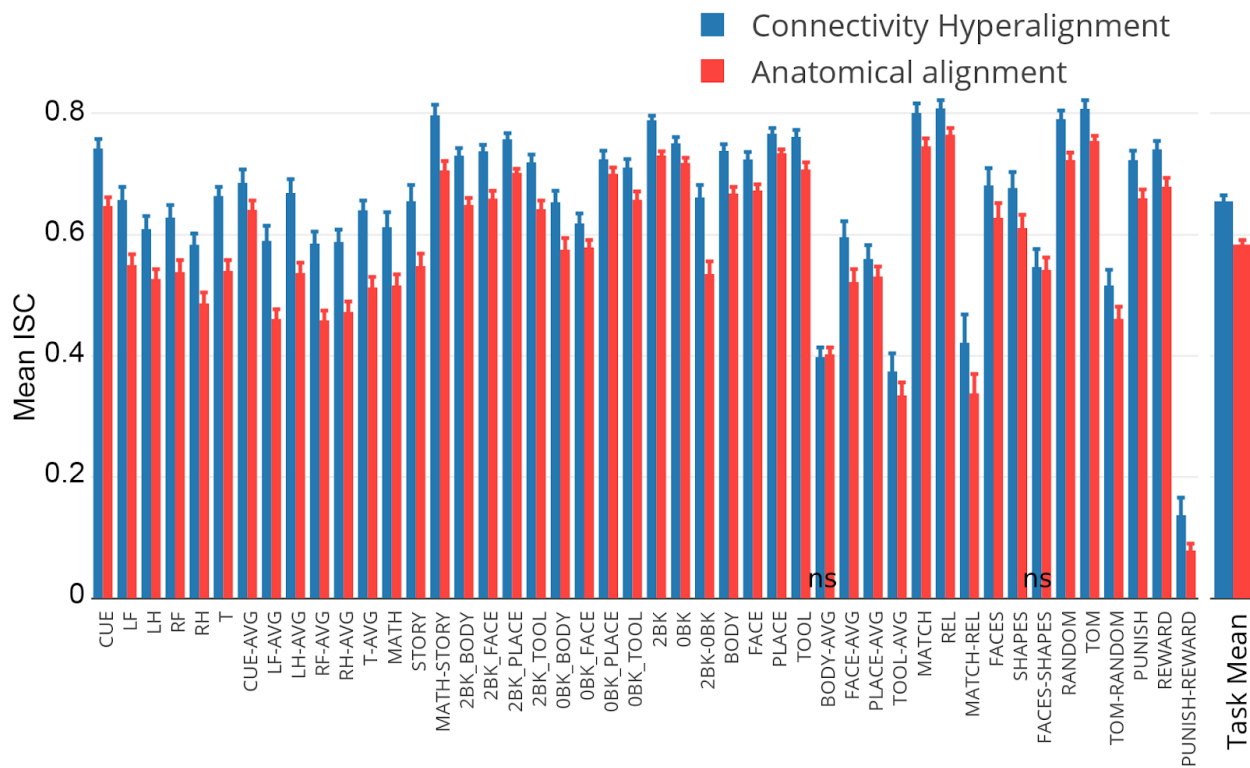

Figure 7

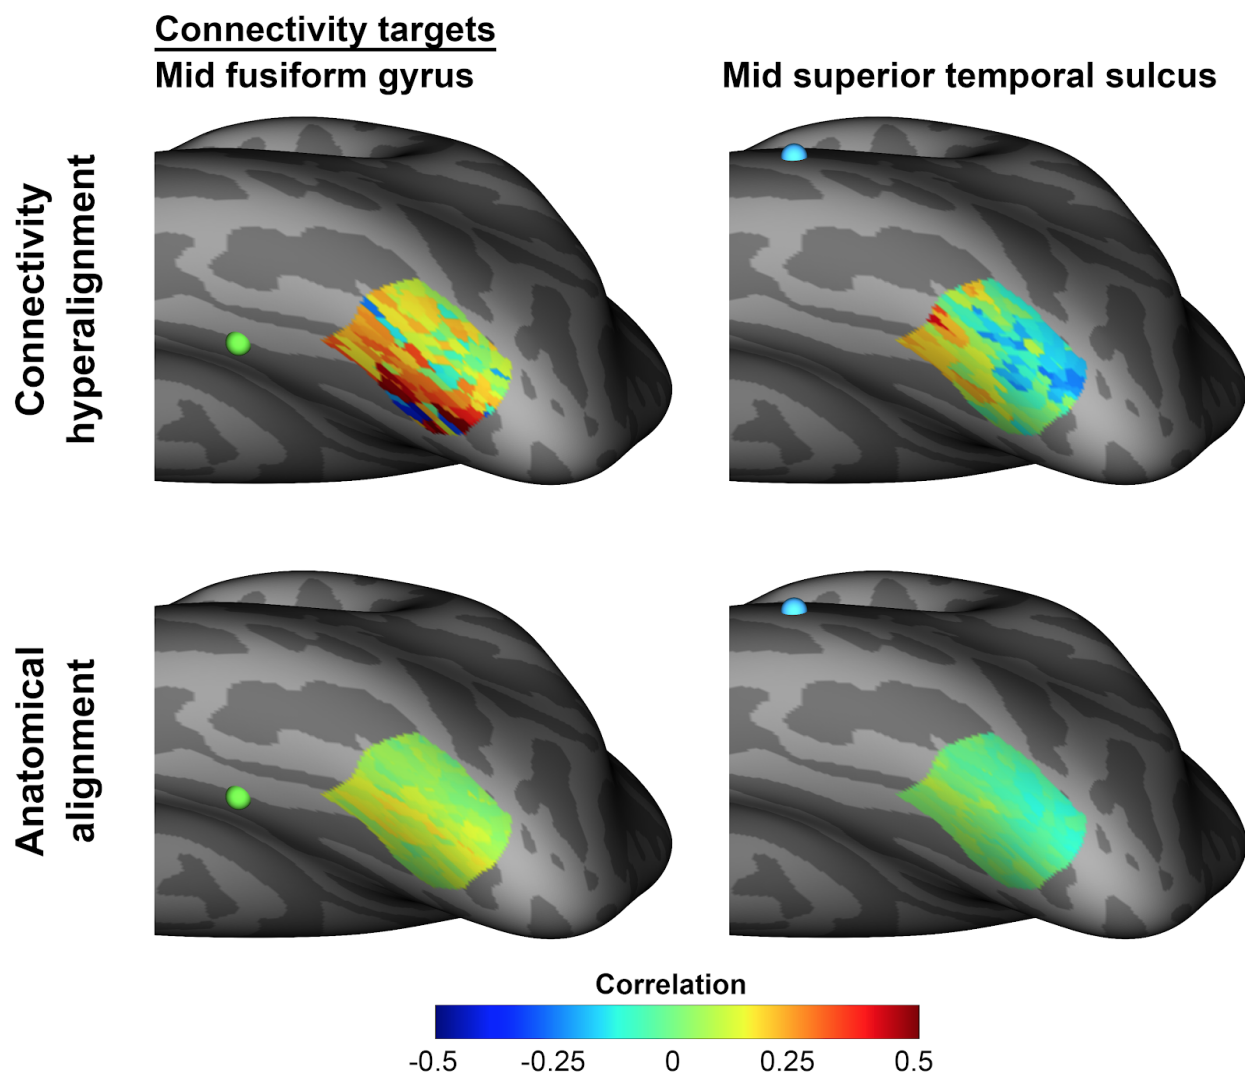

Source: http://biorxiv.org/content/10.1101/108738v5.full.pdf
